1 **A single intranasal or intramuscular immunization with chimpanzee adenovirus**  
2 **vectored SARS-CoV-2 vaccine protects against pneumonia in hamsters.**

3 Traci L. Bricker<sup>1</sup>, Tamarand L. Darling<sup>1</sup>, Ahmed O. Hassan<sup>1</sup>, Houda H. Harastani<sup>1</sup>, Allison Soung<sup>1</sup>,  
4 Xiaoping Jiang<sup>1</sup>, Ya-Nan Dai<sup>3</sup>, Haiyan Zhao<sup>3</sup>, Lucas J. Adams<sup>3</sup>, Michael J. Holtzman<sup>1</sup>, Adam L.  
5 Bailey<sup>1</sup>, James Brett Case<sup>1</sup>, Daved H. Fremont<sup>2,3,4</sup>, Robyn Klein<sup>1,3,5</sup>, Michael S. Diamond<sup>1,2,3</sup>, and  
6 Adrianus C. M. Boon<sup>1,2,3</sup>

7

8 <sup>1</sup>Department of Internal Medicine, <sup>2</sup>Department of Molecular Microbiology and Microbial  
9 Pathogenesis, <sup>3</sup>Department of Pathology and Immunology, <sup>4</sup>Department of Biochemistry and  
10 Biophysics, <sup>5</sup>Department of Neuroscience, Washington University in Saint Louis School of  
11 Medicine, St. Louis, MO 63110, USA

12

13

14 **Corresponding Author:**

15 Adrianus C. M. Boon

16 Department of Internal Medicine

17 Washington University in Saint Louis

18 School of Medicine

19 St. Louis, MO 63110

20 Email: [jboon@wustl.edu](mailto:jboon@wustl.edu)

21

22 Running Title: Intranasal SARS-CoV-2 vaccine protects Syrian hamsters from COVID-19

23 **ABSTRACT**

24 The development of an effective vaccine against SARS-CoV-2, the etiologic agent of COVID-  
25 19, is a global priority. Here, we compared the protective capacity of intranasal and intramuscular  
26 delivery of a chimpanzee adenovirus-vectored vaccine encoding a pre-fusion stabilized spike  
27 protein (ChAd-SARS-CoV-2-S) in Golden Syrian hamsters. While immunization with ChAd-  
28 SARS-CoV-2-S induced robust spike protein specific antibodies capable of neutralizing the virus,  
29 antibody levels in serum were higher in hamsters immunized by an intranasal compared to  
30 intramuscular route. Accordingly, ChAd-SARS-CoV-2-S immunized hamsters were protected  
31 against a challenge with a high dose of SARS-CoV-2. After challenge, ChAd-SARS-CoV-2-S-  
32 immunized hamsters had less weight loss and showed reductions in viral RNA and infectious  
33 virus titer in both nasal swabs and lungs, and reduced pathology and inflammatory gene  
34 expression in the lungs, compared to ChAd-Control immunized hamsters. Intranasal  
35 immunization with ChAd-SARS-CoV-2-S provided superior protection against SARS-CoV-2  
36 infection and inflammation in the upper respiratory tract. These findings support intranasal  
37 administration of the ChAd-SARS-CoV-2-S candidate vaccine to prevent SARS-CoV-2 infection,  
38 disease, and possibly transmission.

## 39 INTRODUCTION

40 Severe acute respiratory syndrome coronavirus 2 (SARS-CoV-2) initiated a global pandemic  
41 in 2019, leading to millions of confirmed positive cases of coronavirus infection disease (COVID)-  
42 19, and an estimated case-fatality rate of 2-3% and infection fatality rate of 0.68% [1-3]. The  
43 elderly, immunocompromised and those with an underlying illness, including obesity, diabetes,  
44 hypertension, and chronic lung disease, are at greater risk of severe disease and death from  
45 SARS-CoV-2 [4, 5]. Antiviral therapies and vaccines are urgently needed to curb the spread of  
46 the virus and reduce infection and disease in the population.

47 The Golden Syrian hamster (*Mesocricetus auratus*) is one of several COVID-19 animal  
48 models [6-13]. Hamsters are naturally susceptible to SARS-CoV-2 infection, and intranasal  
49 inoculation results in mild-to-moderate disease including labored breathing, signs of respiratory  
50 distress, ruffled fur, weight loss and hunched posture [10, 13]. Aged and male hamsters develop  
51 more severe disease, mimicking COVID-19 in humans [11]. In hamsters, SARS-CoV-2 primarily  
52 infects the upper and lower respiratory tracts, although viral RNA and antigen has been detected  
53 in other tissues (e.g., intestines, heart, and olfactory bulb). The peak of virus replication occurs  
54 between days 2 and 3 post infection (dpi) and is cleared by 14 dpi in surviving animals.  
55 Histopathological analysis of infected hamsters shows multifocal interstitial pneumonia  
56 characterized by pulmonary consolidation starting as early as 2 dpi. Inflammation is associated  
57 with leukocyte infiltration, comprised primarily of macrophages and neutrophils, and an increase  
58 in type I and III interferon (IFN) and other pro-inflammatory cytokine and chemokines [14, 15].  
59 High-resolution computed tomography scans shows airway dilation and consolidation in the lungs  
60 of infected hamsters [10]. SARS-CoV-2-induced lung pathology in hamsters appears driven by  
61 immune pathology, as lung injury is reduced in *STAT2*<sup>-/-</sup> hamsters despite an increase in viral  
62 burden and tissue dissemination [14].

63 The SARS-CoV-2 hamster model has been used to study the efficacy of several drugs and  
64 candidate vaccines. Hydroxychloroquine had no impact on infectious virus titers and disease,

65 whereas favipiravir reduced viral burden only when high doses were used [16-19]. Several  
66 candidate vaccines also have been tested. Yellow fever 17D-vectored and adenovirus (Ad)26-  
67 vectored SARS-CoV-2 vaccine candidates conferred protection against SARS-CoV-2 challenge  
68 in hamsters [15, 20]. Hamsters immunized intramuscularly (IM) with Ad26-vectored prefusion-  
69 stabilized spike (S) protein sustained less weight loss and fewer SARS-CoV-2-infected cells in  
70 the lungs at 4 dpi [20]. Syrian hamsters immunized twice by intraperitoneal injection with YF17D-  
71 vector expressing the S protein of SARS-CoV-2 showed reduced viral burden, inflammatory gene  
72 expression, and pathology in the lung [15]. Other vectored vaccines including a Newcastle  
73 Disease virus-S (NDV-S) and vesicular stomatitis virus-S (VSV-S) vaccine delivered IM also  
74 protected Syrian hamsters from SARS-CoV-2 infection [21, 22]. Alternative routes of  
75 administration have not been tested in hamsters.

76 Here, we tested the efficacy of a chimpanzee adenovirus (ChAd)-vectored vaccine expressing  
77 a prefusion-stabilized version of the S protein of SARS-CoV-2 (ChAd-SARS-CoV-2-S, [23]) in  
78 Syrian hamsters following IM or intranasal (IN) delivery. A single dose of the vaccine induced a  
79 robust S protein specific antibody response capable of neutralizing SARS-CoV-2, with IN delivery  
80 inducing approximately 6-fold higher antibody titers than IM delivery. Upon challenge, the ChAd-  
81 SARS-CoV-2-S immunized animals had less infectious virus and viral RNA in the lungs and nasal  
82 swabs, and this was associated with reduced pathology and numbers of viral-infected cells in the  
83 lungs at 3 dpi. The upper respiratory tract, i.e. the nasal cavity, of the hamsters demonstrated  
84 reduced pathology and SARS-CoV-2 infected cells only after IN immunization with ChAd-SARS-  
85 CoV-2-S. Collectively, these data show differences in protection mediated by the same vaccine  
86 when alternative routes of immunization are used, and support intranasal vaccine delivery for  
87 optimal protection against SARS-CoV-2 challenge.

## 88 MATERIALS AND METHODS

89 **SARS-CoV-2 infection of Golden Syrian hamsters.** SARS-CoV-2 (strain 2019-nCoV/USA-  
90 WA1/2020) was propagated on MA-104 monkey kidney cells, and the virus titer was determined  
91 by focus forming and plaque assays. Five-week old male hamsters were obtained from Charles  
92 River Laboratories and housed at Washington University. Five days after arrival, a pre-  
93 immunization serum sample was obtained, and the animals (n = 10 per group) were vaccinated  
94 via intranasal (IN) or intramuscular (IM) route with  $10^{10}$  viral particles of a chimpanzee adenovirus  
95 vector expressing a pre-fusion stabilized spike (S) protein of SARS-CoV-2 (ChAd-SARS-CoV-2-  
96 S [23]) or a control chimpanzee adenovirus vector (ChAd-Control) in 100  $\mu$ L of phosphate buffered  
97 saline (PBS). Twenty-one days later, a second serum sample was obtained, and the animals were  
98 transferred to the enhanced biosafety level 3 laboratory. One day later, the animals were  
99 challenged via IN route with  $2.5 \times 10^5$  PFU of SARS-CoV-2. Animal weights were measured daily  
100 for the duration of the experiment. Two days after challenge, a nasal swab was obtained. The  
101 swab was moistened in 1.0 mL of serum-free media and used to rub the outside of the hamster  
102 nose. The swab was placed into the vial containing the remainder of the 1.0 mL of media,  
103 vortexed, and stored for subsequent virological analysis. Three days after challenge, a subset of  
104 animals was sacrificed, and their lungs were collected for virological and histological analysis.  
105 The left lobe was homogenized in 1.0 mL DMEM, clarified by centrifugation ( $21,000 \times g$  for 5  
106 minutes) and used for viral titer analysis by quantitative RT-PCR using primers and probes  
107 targeting the N gene or the 5' UTR region, and by focus forming assay (FFA). From these same  
108 animals, we also collected serum for antibody analysis and heads for histological analysis. The  
109 remaining animals were sacrificed at 10 dpi, and serum was collected for analysis of antibody  
110 against the nucleoprotein (N protein) of SARS-CoV-2.

111 **Virus titration assays.** FFA were performed on Vero-E6 cells in a 96-well plate. Lung tissue  
112 homogenates were serially diluted 10-fold, starting at 1:10, in cell infection medium (DMEM + 2%  
113 FBS + L-glutamine + penicillin + streptomycin), and 100  $\mu$ L of the diluted virus was added to two

114 wells per dilution per sample. After 1 h at 37°C, the inoculum was aspirated, the cells were washed  
115 with PBS, and a 1% methylcellulose overlay in infection medium was added. Positive and  
116 negative controls were included in every assay. Twenty-four hours after virus inoculation, the cells  
117 were fixed with formalin, and infected cells were detected by the addition of 100 µL of 1:1000  
118 diluted anti-S protein monoclonal antibody (1C02, gift from Dr. Ellebedy at Washington University)  
119 in permeabilization buffer (1x PBS, 2% FBS, 0.2% saponin (Sigma, Cat #S7900)) for 1 h at 20°C  
120 or overnight at 4°C, followed by an anti-human-IgG-HRP antibody (Sigma, Cat. #A6029) in  
121 permeabilization buffer for 1 h at 20°C. The assay was developed using TMB substrate (Vector  
122 laboratories, SK4400) for 5-10 min at 20°C. The assay was stopped by washing the cells with  
123 water. The number of foci per well were counted on the BioSpot analyzer (Cellular Technology  
124 Limited) and used to calculate the focus forming units/mL (FFU/mL).

125 Plaque assays were performed on Vero E6 cells in 24-well plates. Nasal swabs or lung tissue  
126 homogenates were serially diluted 10-fold, starting at 1:10, in cell infection medium (DMEM + 2%  
127 FBS + L-glutamine + penicillin + streptomycin). Two hundred and fifty microliters of the diluted  
128 virus were added to a single well per dilution per sample. After 1 h at 37°C, the inoculum was  
129 aspirated, the cells were washed with PBS, and a 1% methylcellulose overlay in MEM  
130 supplemented with 2% FBS was added. Seventy-two hours after virus inoculation, the cells were  
131 fixed with 4% formalin, and the monolayer was stained with crystal violet (0.5% w/v in 25%  
132 methanol in water) for 1 h at 20°C. The number of plaques were counted and used to calculate  
133 the plaque forming units/mL (PFU/mL).

134 To quantify viral load in nasal swabs and lung tissue homogenates, RNA was extracted using  
135 RNA isolation kit (Omega). SARS-CoV-2 RNA levels were measured by one-step quantitative  
136 reverse transcriptase PCR (qRT-PCR) TaqMan assay as described previously [23]. A SARS-  
137 CoV-2 nucleocapsid (N) specific primers/probe set (L primer: ATGCTGCAATCGTGCTACAA; R  
138 primer: GACTGCCGCCTCTGCTC; probe: 5'-FAM/TCAAGGAAC/ZEN/AACATTGCCAA/3'-  
139 IABkFQ) or 5' UTR specific primers/probe set (L primer: ACTGTCGTTGACAGGACACG; R

140 primer: AACACGGACGAAACCGTAAG; probe: 5'-FAM/CGTCTATCT/ZEN/TCTGCAGGCTG/3'-  
141 IABkFQ). Viral RNA was expressed as (N) gene or 5' UTR copy numbers per mg for lung tissue  
142 homogenates or mL for nasal swabs, based on a standard included in the assay, which was  
143 created via *in vitro* transcription of a synthetic DNA molecule containing the target region of the N  
144 gene and 5'-UTR region.

145 **ELISA.** Purified viral antigens (S, RBD, or NP) [23] were coated onto 96-well Maxisorp clear  
146 plates at 2 µg/mL in 50 mM Na<sub>2</sub>CO<sub>3</sub> pH 9.6 (70 µL) or PBS (50 µL) overnight at 4°C. Coating  
147 buffers were aspirated, and wells were blocked with 200 µL of 1X PBS + 0.05% Tween-20 + 5%  
148 BSA + 0.02% NaN<sub>3</sub> (Blocking buffer, PBSTBA) or 1X PBS + 0.05% Tween-20 + 10% FCS  
149 (PBSTF) either for 2 h at 20°C, 1 h at 37°C or overnight at 4°C. Heat-inactivated serum samples  
150 were diluted in PBSTBA or PBSTF in a separate 96-well polypropylene plate. The plates then  
151 were washed thrice with 1X PBS + 0.05% Tween-20 (PBST), followed by addition of 50 µL of  
152 respective serum dilutions. Sera were incubated in the blocked ELISA plates for at least 1 h at  
153 room temperature. The ELISA plates were again washed thrice in PBST, followed by addition of  
154 50 µL of 1:1000 anti-hamster-IgG(H+L)-HRP (Southern Biotech Cat. #6061-05) in PBST or  
155 PBSTF or 1:1000 anti-hamster-IgG2/IgG3-HRP in PBST or PBSTF (Southern Biotech Cat.  
156 #1935-05). Plates were incubated at room temperature for 1-2 h, washed thrice in PBST and 50  
157 µL of 1-Step Ultra TMB-ELISA was added (Thermo Fisher Scientific, Cat. #34028). Following a  
158 12 to 15-min incubation, reactions were stopped with 50 µL of 2 M H<sub>2</sub>SO<sub>4</sub>. The absorbance of  
159 each well at 450 nm was read (Synergy H1 or Epoch) within 2 min of addition of H<sub>2</sub>SO<sub>4</sub>.

160 **SARS-CoV-2 neutralization assay.** Heat-inactivated serum samples were diluted 1:10 fold  
161 serially and incubated with 10<sup>2</sup> FFU of SARS-CoV-2 for 1 h at 37°C. The virus-serum mixtures  
162 were added to Vero-E6 cell monolayers in 96-well plates and incubated for 1 h at 37°C.  
163 Subsequently, cells were overlaid with 1% (w/v) methylcellulose in MEM supplemented with 2%  
164 FBS. Plates were incubated for 30 h before fixation using 4% PFA in PBS for 1 h at 20°C. Cells  
165 were washed and then sequentially incubated with anti-SARS-CoV-2 CR3022 mAb [24] (1 µg/mL)

166 and a HRP-conjugated goat anti-human IgG (Sigma, Cat#A6029) in PBS supplemented with 0.1%  
167 (w/v) saponin and 0.1% BSA. TrueBlue peroxidase substrate (KPL) was used to develop the  
168 plates before counting the foci on a BioSpot analyzer (Cellular Technology Limited).

169 **Histology and RNA *in situ* hybridization.** The lungs and heads from SARS-CoV-2 infected  
170 and control hamsters were fixed in 10% formalin for seven days. Lungs were embedded in paraffin  
171 and sectioned before hematoxylin and eosin staining (H & E) and RNA *in situ* hybridization (RNA-  
172 ISH) to detect SARS-CoV-2 RNA. Following formalin fixation, heads were decalcified in 0.5 M  
173 EDTA for seven days, cryoprotected in three exchanges of 30% sucrose for three days, and then  
174 embedded in O.C.T. compound before RNA-ISH. RNA-ISH was performed using a probe against  
175 the S gene of SARS-CoV-2 (V-nCoV2019-S, Cat #848561) with the RNAscope® 2.5 HD Assay—  
176 BROWN (ACDBio, Cat#322310) according to the manufacturers' recommendations. Lung slides  
177 were scanned using the Hamamatsu NanoZoomer slide scanning system and head sections were  
178 imaged using the Zeiss Axiomager Z2 system. Lung sections were scored according to a  
179 previous publication [10] (<10% affected lung tissue = 1, >10% but <50% affected area = 2, >50%  
180 affected area = 3).

181 **Host response gene analysis.** RNA extracted from hamster lung tissue homogenates was  
182 used to synthesize cDNA using random hexamers and Superscript III (Thermo Scientific) with the  
183 addition of RNase inhibitor according to the manufacturer's protocol. The expression of 22  
184 inflammatory host genes was determined using PrimeTime Gene Expression Master Mix  
185 (Integrated DNA Technologies) with primers/probe sets specific for *C3*, *C5*, *Ccl2*, *Ccl3*, *Ccl5*, *Csf3*,  
186 *Cxcl10*, *Ddx58*, *Ifit3*, *Ifng*, *Irf7*, *IL1b*, *IL4*, *IL5*, *IL6*, *IL7*, *IL10*, *IL12p40*, *IL15*, *Stat1*, *Stat6*, and *Tnfa*  
187 and results were normalized to *Rpl18* and *B2m* levels. The primers and probes were derived from  
188 previous publications [25] or developed in-house (see **Table S1**). Fold change was determined  
189 using the 2- $\Delta\Delta$ Ct method comparing immunized and SARS-CoV-2 challenged hamsters to naïve  
190 controls.



191        **Statistical Analysis.** The data was analyzed with GraphPad Prism 9.0 and statistical  
192        significance was assigned when *P* values were < 0.05. All tests and values are indicated in the  
193        relevant Figure legends.

194 **RESULTS**

195 **Development of the SARS-CoV-2 hamster model.** To establish the utility of the hamster  
196 model in our hands, we inoculated twenty-one 5-6 week old male hamsters IN with  $2 \times 10^5$  plaque  
197 forming units (PFU) of a fully infectious SARS-CoV-2 isolate in 100  $\mu$ L of PBS. A control group of  
198 three 5-6 week old male hamsters was inoculated with PBS. Mock-infected animals continued to  
199 gain weight at a rate of  $\sim 2.4$  grams or  $\sim 3\%$  per day (**Fig 1A**). In contrast, SARS-CoV-2 inoculated  
200 hamsters began to lose weight at 2 dpi, and this continued through days 4-5, at which point the  
201 animals had lost approximately 10% of their body weight (**Fig 1A**). This decrease was associated  
202 with a reduction in food intake between 1 and 4 dpi (**Fig 1B**).

203 At indicated time points after infection, hamsters were sacrificed, and tissues were collected  
204 for analysis of viral burden, histology, and serological response. The left lung lobe was collected,  
205 homogenized, and used to quantify SARS-CoV-2 N-gene copy number and infectious virus titer  
206 by qPCR and focus-forming assay (FFA), respectively. Infectious virus titers peaked at 2 dpi with  
207  $8 \times 10^5$  focus forming units/mL (FFU/mL), and levels declined to low or undetectable by 5 dpi (**Fig**  
208 **1C**). SARS-CoV-2 N-gene copy number also peaked at 2 dpi at  $10^{10}$  copies per  $\mu$ L and gradually  
209 declined to  $10^5$ - $10^6$  copies by 8 to 14 dpi (**Fig 1D**). The remainder of the lung tissue was fixed in  
210 formalin, embedded, and sectioned for viral RNA *in situ* hybridization (ISH) and hematoxylin and  
211 eosin (H & E) staining. SARS-CoV-2 viral RNA was detected by RNA-ISH at 2-5 dpi (**Fig 1E** and  
212 **Fig S1**) and was no longer detectable by 8 dpi. Viral RNA was localized to both airway and  
213 alveolar epithelial cells (**Fig S1**). Infection was accompanied by immune cell infiltration in  
214 peribronchiolar and adjacent alveolar locations from 2 through 8 dpi (**Fig 1E-F**), a pattern that is  
215 consistent with bronchopneumonia. The immune cell infiltration was associated with alveolar  
216 edema, exudate, tissue damage and intraparenchymal hemorrhage (**Fig 1E-F**). Each of these  
217 features of histopathology were markedly decreased by 14 dpi (**Fig 1F**).

218 Serum samples were assayed for the presence of antibodies specific for purified, recombinant  
219 S protein by ELISA. Low or undetectable antibody responses were detected through 4 dpi (**Fig**

220 **1G.** By day 5, S-specific IgG(H+L) responses were detected in all five animals, and the serum  
221 antibody titer further increased between 8 and 14 dpi.

222 **Chimpanzee Ad-vectored vaccine elicits robust antibody responses against SARS-**  
223 **CoV-2 in hamsters.** We assessed the immunogenicity of a replication-incompetent ChAd vector  
224 encoding a prefusion-stabilized, full-length sequence of SARS-CoV-2 S protein (ChAd-SARS-  
225 CoV-2-S) [23] in Golden Syrian hamsters. We used a ChAd vector without a transgene (ChAd-  
226 control) as a control. Groups of ten 5-6 week-old male hamsters were immunized once via IN or  
227 IM route with  $10^{10}$  virus particles of ChAd-control or ChAd-SARS-CoV-2-S. Serum was collected  
228 prior to immunization or 21 days after, and antibody responses were evaluated by ELISA against  
229 purified recombinant S and RBD proteins. Immunization with ChAd-SARS-CoV-2-S induced high  
230 levels of anti-S and anti-RBD IgG(H+L) and IgG2/IgG3 antibodies 21 days later, whereas low or  
231 undetectable levels of S- and RBD-specific antibodies were present in samples from ChAd-control  
232 immunized animals (**Fig 2A-F** and **Fig S2**). The antibody response was significantly higher after  
233 IN than IM immunization (5 to 7-fold,  $P < 0.0001$  for anti-S and anti-RBD respectively, **Fig 2G-H**).  
234 Serum samples also were tested for neutralization of infectious SARS-CoV-2 by focus-reduction  
235 neutralization test (FRNT). As expected, pre-immunization sera or sera from hamsters immunized  
236 with ChAd-control did not inhibit virus infection (**Fig 2I**). In contrast, sera from animals immunized  
237 with ChAd-SARS-CoV-2-S neutralized infectious virus with geometric mean titers (GMT) of  
238 1:1217 and 1:276 for IN and IM immunization routes, respectively (**Fig 2I**).

239 **Immunization with Chimpanzee Ad-vectored vaccine protects hamsters from SARS-**  
240 **CoV-2 challenge.** We next evaluated the protective effect of the ChAd vaccines in the hamster  
241 SARS-CoV-2 challenge model. Golden Syrian hamsters immunized with ChAd-SARS-CoV-2-S  
242 or ChAd-control were challenged IN with  $2.5 \times 10^5$  PFU of SARS-CoV-2, and 2 dpi a nasal swab  
243 was collected for viral burden analysis by qPCR and plaque assay. The N-gene copy number in  
244 the ChAd-control immunized animals was  $\sim 10^9$  copies per mL in both the IM and IN control groups  
245 (**Fig 3A**). Immunization with ChAd-SARS-CoV-2-S reduced the N-gene copy number by 100-fold

246 in the IN ( $10^7$ /mL) and 10-fold in the IM ( $10^8$ /mL) immunized animals ( $P < 0.0001$  and  $P < 0.001$   
247 respectively, **Fig 3A**). N-gene copy number was significantly lower in the IN than IM immunized  
248 animals ( $P < 0.05$ , **Fig 3A**). At 2 dpi, infectious virus was detected by plaque assay in 4 of 20  
249 ChAd-SARS-CoV-2-S-immunized animals and 15 of 20 ChAd-control immunized animals (**Fig**  
250 **3B**). At 3 dpi, six hamsters per group were sacrificed, and lungs were collected for viral burden  
251 analysis (left lobe) by qPCR or FFA, or for histology (other lung lobes). In the control groups, we  
252 detected  $10^9$  - $10^{10}$  copies of N-gene per mg of lung homogenate, and the mean infectious titer  
253 was  $6 \times 10^4$  FFU/mL. No difference was observed between the two control groups. Immunization  
254 with ChAd-SARS-CoV-2-S vaccine significantly reduced the N-gene copy number ( $P < 0.01$ , **Fig**  
255 **3C**) and infectious titer in both the IN and IM immunized group (**Fig 3D**). A comparison between  
256 IN and IM immunization revealed significantly lower N-gene copies per mg (788-fold,  $P < 0.01$ ,  
257 **Fig 3C**), but not in infectious virus titer ( $P = 0.5$ , **Fig 3D**), in the lungs of IN immunized animals.  
258 The remaining four animals per group were monitored for weight loss for 10 days. The ChAd-  
259 control immunized animals lost an average of 4% and 8% of their starting body weight (**Fig 3E**).  
260 Immunization with ChAd-SARS-CoV-2-S attenuated weight loss after SARS-CoV-2 challenge in  
261 both groups ( $P < 0.01$ , **Fig 3E**), with a possibly greater effect following IN immunization. To assess  
262 if the ChAd-SARS-CoV-2-S vaccine induced sterilizing immunity by either of the immunization  
263 routes, we collected the serum 10 dpi to test for the presence of antibodies against recombinant  
264 NP by ELISA. A robust anti-NP IgG(H+L) (**Fig S3**) and IgG2/3 (**Fig 3F**) antibody response was  
265 detected in all ChAd-control and ChAd-SARS-CoV-2-S immunized animals.

266 **Immunization with Chimpanzee Ad-vectored vaccine minimizes lung pathology in**  
267 **hamsters.** To support these findings, we performed RNA *in situ* hybridization (RNA-ISH) and H  
268 & E staining on sections from formalin-fixed lung tissues from immunized hamsters. RNA-ISH  
269 detected viral RNA in all animals immunized with ChAd-control vaccine (**Fig 4A-B** and **Fig S4**).  
270 On average, ~20% of the section was positive for SARS-CoV-2 RNA. The presence of viral RNA

271 was associated with inflammation, tissue damage, and bronchopneumonia, as evidenced by  
272 immune cell infiltration around bronchioles, alveolar edema, fluid exudates, and intraparenchymal  
273 hemorrhage (**Fig S4**). In contrast, sections from animals immunized IM with ChAd-SARS-CoV-2-  
274 S contained no or few SARS-CoV-2 positive cells by RNA-ISH and inflammation was greatly  
275 reduced ( $P < 0.01$ , **Fig 4A-B** and **Fig S5**). No SARS-CoV-2 positive cells were detected following  
276 IN immunization with ChAd-SARS-CoV-2-S ( $P < 0.01$ , **Fig 4A-B** and **Fig S5**).

277 An ideal SARS-CoV-2 vaccine would confer protection against disease and prevent virus  
278 infection and transmission. We hypothesized that IN delivery of the vaccine could provide superior  
279 protection in the upper respiratory tract compared to IM delivery. Hamster heads were collected  
280 3 dpi and fixed in formalin. Following decalcification and embedding, sagittal sections were  
281 obtained and RNA-ISH was performed (**Fig 4C**). SARS-CoV-2 RNA was detected in the nasal  
282 cavity and ethmoturbinates of all 12 hamsters immunized IN or IM with ChAd-control (**Fig 4D, left**  
283 **panel**). No difference in viral RNA staining was observed between the two groups. Animals  
284 immunized IM with ChAd-SARS-CoV-2-S contained fewer SARS-CoV-2 positive cells and less  
285 cellular debris than ChAd-Control vaccinated animals (**Fig 4D**). However, animals immunized IN  
286 with ChAd-SARS-CoV-2-S had the fewest number of SARS-CoV-2-positive cells, and cellular  
287 debris was further reduced (**Fig 4D**). Collectively, these studies show that the ChAd-SARS-CoV-  
288 2-S vaccine is highly protective in the hamster model of COVID-19, and IN delivery of this vaccine  
289 provides superior protection against upper respiratory tract infection.

290 **Inflammatory gene expression is reduced after SARS-CoV-2 challenge in the ChAd-**  
291 **SARS-CoV-2 immunized hamsters.** Lung pathology after SARS-CoV-2 infection appears to be  
292 driven by inflammation [14]. Thus, a successful vaccine should reduce or eliminate the  
293 inflammatory response after infection or challenge with SARS-CoV-2. The inflammatory response  
294 was evaluated in the ChAd-control and ChAd-SARS-CoV-2-S immunized hamsters 3 days after  
295 challenge with SARS-CoV-2. RNA was extracted from the tissue homogenates and analyzed by  
296 qRT-PCR using 24 different primer-probe sets specific for two housekeeping genes ( $\beta 2m$  and

297 *Rpl18*) and 22 different innate and inflammatory host genes (**Table S1**). Compared to five naïve  
298 animals, expression of 8/22 inflammatory host genes (*Ccl2*, *Ccl3*, *Cxcl10*, *Ddx58*, *Ifit3*, *IL10*,  
299 *IL12p40*, and *Irf7*) increased > 2-fold in the ChAd-Control immunized and SARS-CoV-2 challenged  
300 animals (**Fig 5A**). A significant increase in gene-expression was observed for *Ccl3*, *Ifit3*, *Cxcl10*,  
301 and *Irf7* in both ChAd-Control-IN and ChAd-Control-IM animals ( $P < 0.05$ , **Fig 5A**). ChAd-SARS-  
302 CoV-2-S immunization significantly reduced inflammatory gene expression after SARS-CoV-2  
303 challenge (**Fig 5B**) with the expression of a subset of host genes, such as *Ccl5*, *Ccl3* and *Cxcl10*,  
304 near normal levels. A comparison in host gene expression between IM and IN immunization  
305 identified *Irf7* and *Ifit3* as two host genes whose expression was significantly ( $P < 0.01$ ) lower in  
306 the IN compared to IM immunized animals (**Fig 5B**). These data suggest that IN delivery of the  
307 ChAd-vectored SARS-CoV-2-S vaccine provides greater protection against SARS-CoV-2  
308 infection, inflammation, and disease in hamsters.

## 309 **DISCUSSION**

310 Effective vaccines against SARS-CoV-2 are needed to combat the devastating pandemic. In  
311 this study, we evaluated IN and IM delivery of a ChAd-vectored vaccine expressing a prefusion  
312 stabilized S protein of SARS-CoV-2 in the Syrian hamster challenge model. A single dose of  
313 ChAd-SARS-CoV-2 induced S- and RBD-specific serum antibodies capable of neutralizing  
314 SARS-CoV-2. Antibody responses were higher after IN than IM immunization. Following  
315 challenge with a high dose of SARS-CoV-2, IN and IM immunization reduced infectious virus titers  
316 and viral RNA levels in the lungs and nasal swabs, albeit the effect was greater following IN  
317 immunization. Immunization with ChAd-SARS-CoV-2 also reduced weight loss, lung pathology  
318 and inflammatory gene expression in the lungs of the animals with a greater effect again seen  
319 after IN immunization. Finally, IN immunization protected the upper respiratory tract of hamsters,  
320 whereas IM immunization did not. Combined, these studies demonstrate that a single dose of  
321 ChAd-SARS-CoV-2-S vaccine delivered IN provides better protection than IM immunization  
322 against SARS-CoV-2 challenge in Syrian hamsters.

323 At least four different virally vectored vaccines have been tested in Syrian hamsters [20, 21].  
324 A single dose of IN delivered ChAd-SARS-CoV-2-S vaccine induced serum antiviral neutralizing  
325 titers of around 1:1217, which is at least several fold higher than IM delivery of Ad26-S (1:360)  
326 and VSV-S, or intraperitoneal delivery of Y17F-S (1:630). Furthermore, IN delivery of ChAd-  
327 SARS-CoV-2-S protected the upper respiratory tract against infection with SARS-CoV-2 and no  
328 weight loss was detected after virus challenge. This contrasts with the other vaccine candidates  
329 where the vaccinated hamsters lose between 0 and 5% of their body weight after challenge.

330 The reason for the higher antibody responses after IN versus IM immunization currently is not  
331 known. One possibility is that the respiratory tract of the hamster is more permissive for the ChAd  
332 virus than muscle, which could increase the amount of SARS-CoV-2-S antigen produced.  
333 Alternatively, the mucosal immune response to the S protein or ChAd infection in the respiratory  
334 tract is unique compared to the thigh muscle. The most striking difference between IN and IM

335 immunization is the enhanced protection of the upper respiratory tract infection, with minimal or  
336 no viral RNA detected in the nasal olfactory neuroepithelium, which expresses known receptors  
337 for SARS-CoV-2 [26]. This effect may be due to the induction of local S protein specific immunity  
338 capable of neutralizing virus in the upper respiratory tract. In mice, IN immunization induced  
339 robust S-specific IgA antibodies [23], whereas IM immunization did not. Anti-hamster-IgA  
340 secondary antibodies currently are not commercially available. Nonetheless, we would expect to  
341 find similar IgA responses that can neutralize incoming virus. As a result of the superior protection  
342 of the nasal cavity and upper respiratory tract, it IN delivery of ChAd-SARS-CoV-2-S may offer  
343 protection against both infection and transmission of SARS-CoV-2.

344 IN immunization offers many benefits over more traditional approaches [27]. Besides the ease  
345 of administration and lack of needles, IN delivery is associated with mucosal immune responses  
346 including the production of IgA and stimulation of T- and B-cells in the nasopharynx-associated  
347 lymphoid tissue [28]. Influenza virus vaccines are the only licensed IN vaccines to date for  
348 individuals over the age of 2 and less than 50 years old. Live-attenuated influenza virus vaccine  
349 (LAIV) are considered safe and efficacious. The exception to this was the 2013-2014 and 2015-  
350 2016 season when the vaccine was no effective against one of the four components [29]. IN  
351 delivery of several viral vectored vaccines has been evaluated in pre-clinical animal models. A  
352 single dose of chimpanzee adenovirus vectored vaccine against the Middle Eastern Respiratory  
353 Syndrome virus protected hDPP4 knock-in mice and rhesus macaques from MERS challenge  
354 [30, 31]. Similarly a parainfluenza virus 5 vectored vaccine expressing the S protein of MERS  
355 protected mice from MERS [32]. A replication-incompetent recombinant serotype 5 adenovirus,  
356 Ad5-S-nb2, carrying a codon-optimized gene encoding Spike protein (S), protected rhesus  
357 macaques from SARS-CoV-2 challenge [33]. Besides coronaviruses, IN delivered adenoviral  
358 vectored vaccines protected non-human primates from Ebola virus [34]. Importantly, in that study,  
359 protection occurred in the presence existing adenovirus-specific immunity. Besides the many  
360 advantages of IN vaccines, IN delivery of a replication defective adenovirus 5 vectored vaccines



361 caused infection of olfactory nerves in mice [35]. In humans, IN delivery of a non-replicating  
362 adenovirus-vectored influenza vaccine was well tolerated and immunogenic [36].

363 The pathogenesis following SARS-CoV-2 infection is mediated in part by a pathological  
364 inflammatory immune response [1]. To evaluate the efficacy of this vaccine on reducing this part  
365 of the syndrome, we quantified changes in gene expression of 22 different hamster inflammatory  
366 and immune genes. Eight out of the 22 showed demonstrated a >2-fold increase in gene  
367 expression, with a clear enrichment for type I and III IFN-induced genes. The expression of  
368 several other hamster host genes, including IFN- $\gamma$ , interleukins (IL-10 is an exception), TNF- $\alpha$ ,  
369 and complement factors did not increase after infection. This lack of expression may be due to  
370 the time of organ collection (3 dpi), when the inflammatory response is still developing. The lack  
371 of IFN- $\gamma$  could be explained by the increase in IL-10 expression or the early time point evaluated  
372 that precedes influx of NK cells and activated T cells.

373 Correlates of immune protection and SARS-CoV-2 associated disease were investigated in  
374 our cohort of hamsters. Virus neutralization in serum correlated better with RBD-specific antibody  
375 levels ( $r = 0.83$ ,  $P < 0.0001$ ) than S-protein specific responses ( $r = 0.31$ ,  $P > 0.05$ , **Fig S6**). Of the  
376 three humoral response parameters, the virus neutralization serum titer (FRNT, IC<sub>50</sub>) correlated  
377 best with weight loss 3 dpi ( $r = 0.59$ ,  $P < 0.0001$ , **Fig S6**). Weight loss at 3 dpi was strongly  
378 associated with viral RNA levels ( $r = -0.68$ ,  $P < 0.001$ ) and infectious virus load ( $r = -0.62$ ,  $P <$   
379  $0.01$ , **Fig S6**) in the lungs, but not in the nasal swabs. Finally, inflammatory host gene-expression  
380 (*Ifit3* and *Cxcl10*) correlated with RNA levels in the lungs ( $r = 0.68$  and  $0.84$  respectively,  $P <$   
381  $0.001$ ), and serum virus neutralization titers ( $r = -0.70$  and  $-0.64$  respectively,  $P < 0.01$ ). These  
382 analyses suggests that RBD-specific, but not S-specific, serum antibody and virus neutralization  
383 titers are important parameters of protection against SARS-CoV-2 and COVID-19 and that high  
384 antibody levels are associated with protection from infection and inflammation.

385 Overall, our studies in hamsters demonstrate that IN delivery of the ChAd-SARS-CoV-2-S  
386 vaccine confers protection against SARS-CoV-2 challenge. Protection is associated with lower

387 virus levels in the lungs and upper and lower respiratory tracts, no weight loss, and reduced  
388 inflammation in the lungs. These findings support further pre-clinical and clinical studies  
389 investigating the vaccine efficacy of IN delivered vaccines against SARS-CoV-2.

390

391

## 392 REFERENCES

- 393 1. Meyerowitz-Katz G, Merone L. A systematic review and meta-analysis of published research data  
394 on COVID-19 infection fatality rates. *Int J Infect Dis.* 2020;101:138-48. Epub 2020/10/03. doi:  
395 10.1016/j.ijid.2020.09.1464. PubMed PMID: 33007452; PubMed Central PMCID: PMC7524446.
- 396 2. Cao Y, Hiyoshi A, Montgomery S. COVID-19 case-fatality rate and demographic and socioeconomic  
397 influencers: worldwide spatial regression analysis based on country-level data. *BMJ open.*  
398 2020;10(11):e043560. Epub 2020/11/06. doi: 10.1136/bmjopen-2020-043560. PubMed PMID: 33148769;  
399 PubMed Central PMCID: PMC7640588.
- 400 3. Dong E, Du H, Gardner L. An interactive web-based dashboard to track COVID-19 in real time.  
401 *Lancet Infect Dis.* 2020;20(5):533-4. Epub 2020/02/23. doi: 10.1016/s1473-3099(20)30120-1. PubMed  
402 PMID: 32087114; PubMed Central PMCID: PMC7159018.
- 403 4. Mudatsir M, Fajar JK, Wulandari L, Soegiarto G, Ilmawan M, Purnamasari Y, et al. Predictors of  
404 COVID-19 severity: a systematic review and meta-analysis. *F1000Research.* 2020;9:1107. Epub  
405 2020/11/10. doi: 10.12688/f1000research.26186.1. PubMed PMID: 33163160; PubMed Central PMCID:  
406 PMC7607482.
- 407 5. Zhou F, Yu T, Du R, Fan G, Liu Y, Liu Z, et al. Clinical course and risk factors for mortality of adult  
408 inpatients with COVID-19 in Wuhan, China: a retrospective cohort study. *Lancet.* 2020;395(10229):1054-  
409 62. Epub 2020/03/15. doi: 10.1016/s0140-6736(20)30566-3. PubMed PMID: 32171076; PubMed Central  
410 PMCID: PMC7270627.
- 411 6. Muñoz-Fontela C, Dowling WE, Funnell SGP, Gsell PS, Riveros-Balta AX, Albrecht RA, et al. Animal  
412 models for COVID-19. *Nature.* 2020;586(7830):509-15. Epub 2020/09/24. doi: 10.1038/s41586-020-2787-  
413 6. PubMed PMID: 32967005.
- 414 7. Pandey K, Acharya A, Mohan M, Ng CL, Reid PS, Byrareddy SN. Animal Models for SARS-CoV-2  
415 research: A Comprehensive Literature Review. *Transboundary and emerging diseases.* 2020. Epub  
416 2020/11/01. doi: 10.1111/tbed.13907. PubMed PMID: 33128861.
- 417 8. Chan JF, Zhang AJ, Yuan S, Poon VK, Chan CC, Lee AC, et al. Simulation of the clinical and  
418 pathological manifestations of Coronavirus Disease 2019 (COVID-19) in golden Syrian hamster model:  
419 implications for disease pathogenesis and transmissibility. *Clin Infect Dis.* 2020. Epub 2020/03/28. doi:  
420 10.1093/cid/ciaa325. PubMed PMID: 32215622; PubMed Central PMCID: PMC7184405.
- 421 9. Cleary SJ, Pitchford SC, Amison RT, Carrington R, Robaina Cabrera CL, Magnen M, et al. Animal  
422 models of mechanisms of SARS-CoV-2 infection and COVID-19 pathology. *British journal of pharmacology.*  
423 2020. Epub 2020/05/29. doi: 10.1111/bph.15143. PubMed PMID: 32462701; PubMed Central PMCID:  
424 PMC7283621.
- 425 10. Imai M, Iwatsuki-Horimoto K, Hatta M, Loeber S, Halfmann PJ, Nakajima N, et al. Syrian hamsters  
426 as a small animal model for SARS-CoV-2 infection and countermeasure development. *Proc Natl Acad Sci*  
427 *U S A.* 2020;117(28):16587-95. Epub 2020/06/24. doi: 10.1073/pnas.2009799117. PubMed PMID:  
428 32571934; PubMed Central PMCID: PMC7368255.
- 429 11. Osterrieder N, Bertzbach LD, Dietert K, Abdelgawad A, Vladimirova D, Kunec D, et al. Age-  
430 Dependent Progression of SARS-CoV-2 Infection in Syrian Hamsters. *Viruses.* 2020;12(7). Epub  
431 2020/07/24. doi: 10.3390/v12070779. PubMed PMID: 32698441; PubMed Central PMCID:  
432 PMC7412213.
- 433 12. Rosenke K, Meade-White K, Letko MC, Clancy C, Hansens F, Liu Y, et al. Defining the Syrian hamster  
434 as a highly susceptible preclinical model for SARS-CoV-2 infection. *bioRxiv.* 2020. Epub 2020/10/01. doi:  
435 10.1101/2020.09.25.314070. PubMed PMID: 32995767; PubMed Central PMCID: PMC7523093.
- 436 13. Sia SF, Yan LM, Chin AWH, Fung K, Choy KT, Wong AYL, et al. Pathogenesis and transmission of  
437 SARS-CoV-2 in golden hamsters. *Nature.* 2020. Epub 2020/05/15. doi: 10.1038/s41586-020-2342-5.  
438 PubMed PMID: 32408338.

- 439 14. Boudewijns R, Thibaut HJ, Kaptein SJF, Li R, Vergote V, Seldeslachts L, et al. STAT2 signaling  
440 restricts viral dissemination but drives severe pneumonia in SARS-CoV-2 infected hamsters. *Nat Commun.*  
441 2020;11(1):5838. Epub 2020/11/19. doi: 10.1038/s41467-020-19684-y. PubMed PMID: 33203860.
- 442 15. Felipe LS, Vercruyse T, Sharma S, Ma J, Lemmens V, van Looveren D, et al. A single-dose live-  
443 attenuated YF17D-vectored SARS-CoV2 vaccine candidate. *bioRxiv.* 2020.
- 444 16. Kaptein SJF, Jacobs S, Langendries L, Seldeslachts L, Ter Horst S, Liesenborghs L, et al. Favipiravir  
445 at high doses has potent antiviral activity in SARS-CoV-2-infected hamsters, whereas hydroxychloroquine  
446 lacks activity. *Proc Natl Acad Sci U S A.* 2020;117(43):26955-65. Epub 2020/10/11. doi:  
447 10.1073/pnas.2014441117. PubMed PMID: 33037151.
- 448 17. Rosenke K, Jarvis MA, Feldmann F, Schwarz B, Okumura A, Lovaglio J, et al. Hydroxychloroquine  
449 prophylaxis and treatment is ineffective in macaque and hamster SARS-CoV-2 disease models. *JCI insight.*  
450 2020. Epub 2020/10/23. doi: 10.1172/jci.insight.143174. PubMed PMID: 33090972.
- 451 18. Driouich J-S, Cochin M, Lingas G, Moureau G, Touret F, Petit PR, et al. Favipiravir antiviral efficacy  
452 against SARS-CoV-2 in a hamster model. *bioRxiv.* 2020.
- 453 19. Kaptein SJ, Jacobs S, Langendries L, Seldeslachts L, ter Horst S, Liesenborghs L, et al. Antiviral  
454 treatment of SARS-CoV-2-infected hamsters reveals a weak effect of favipiravir and a complete lack of  
455 effect for hydroxychloroquine. *bioRxiv.* 2020.
- 456 20. Tostanoski LH, Wegmann F, Martinot AJ, Loos C, McMahan K, Mercado NB, et al. Ad26 vaccine  
457 protects against SARS-CoV-2 severe clinical disease in hamsters. *Nat Med.* 2020. Epub 2020/09/05. doi:  
458 10.1038/s41591-020-1070-6. PubMed PMID: 32884153.
- 459 21. Sun W, McCroskery S, Liu WC, Leist SR, Liu Y, Albrecht RA, et al. A Newcastle disease virus (NDV)  
460 expressing membrane-anchored spike as a cost-effective inactivated SARS-CoV-2 vaccine. *bioRxiv.* 2020.  
461 Epub 2020/08/09. doi: 10.1101/2020.07.30.229120. PubMed PMID: 32766572; PubMed Central PMCID:  
462 PMC7402029.
- 463 22. Yahalom-Ronen Y, Tamir H, Melamed S, Politi B, Shifman O, Achdout H, et al. A single dose of  
464 recombinant VSV-ΔG-spike vaccine provides protection against SARS-CoV-2 challenge. *bioRxiv.* 2020.
- 465 23. Hassan AO, Kafai NM, Dmitriev IP, Fox JM, Smith BK, Harvey IB, et al. A Single-Dose Intranasal  
466 ChAd Vaccine Protects Upper and Lower Respiratory Tracts against SARS-CoV-2. *Cell.* 2020;183(1):169-  
467 84.e13. Epub 2020/09/16. doi: 10.1016/j.cell.2020.08.026. PubMed PMID: 32931734; PubMed Central  
468 PMCID: PMC7437481.
- 469 24. Yuan M, Wu NC, Zhu X, Lee CD, So RTY, Lv H, et al. A highly conserved cryptic epitope in the  
470 receptor binding domains of SARS-CoV-2 and SARS-CoV. *Science.* 2020;368(6491):630-3. Epub  
471 2020/04/05. doi: 10.1126/science.abb7269. PubMed PMID: 32245784; PubMed Central PMCID:  
472 PMC7164391.
- 473 25. Zivcec M, Safronetz D, Haddock E, Feldmann H, Ebihara H. Validation of assays to monitor immune  
474 responses in the Syrian golden hamster (*Mesocricetus auratus*). *J Immunol Methods.* 2011;368(1-2):24-  
475 35. Epub 2011/02/22. doi: 10.1016/j.jim.2011.02.004. PubMed PMID: 21334343; PubMed Central PMCID:  
476 PMC3085612.
- 477 26. Chen M, Shen W, Rowan NR, Kulaga H, Hillel A, Ramanathan M, Jr., et al. Elevated ACE-2  
478 expression in the olfactory neuroepithelium: implications for anosmia and upper respiratory SARS-CoV-2  
479 entry and replication. *Eur Respir J.* 2020;56(3). Epub 2020/08/21. doi: 10.1183/13993003.01948-2020.  
480 PubMed PMID: 32817004; PubMed Central PMCID: PMC7439429.
- 481 27. Yusuf H, Kett V. Current prospects and future challenges for nasal vaccine delivery. *Hum Vaccin*  
482 *Immunother.* 2017;13(1):34-45. Epub 2016/12/10. doi: 10.1080/21645515.2016.1239668. PubMed  
483 PMID: 27936348; PubMed Central PMCID: PMC5287317.
- 484 28. Lycke N. Recent progress in mucosal vaccine development: potential and limitations. *Nat Rev*  
485 *Immunol.* 2012;12(8):592-605. Epub 2012/07/26. doi: 10.1038/nri3251. PubMed PMID: 22828912.

- 486 29. Parker L, Ritter L, Wu W, Maeso R, Bright H, Dibben O. Haemagglutinin stability was not the  
487 primary cause of the reduced effectiveness of live attenuated influenza vaccine against A/H1N1pdm09  
488 viruses in the 2013-2014 and 2015-2016 seasons. *Vaccine*. 2019;37(32):4543-50. Epub 2019/07/08. doi:  
489 10.1016/j.vaccine.2019.06.016. PubMed PMID: 31279567.
- 490 30. Jia W, Channappanavar R, Zhang C, Li M, Zhou H, Zhang S, et al. Single intranasal immunization  
491 with chimpanzee adenovirus-based vaccine induces sustained and protective immunity against MERS-CoV  
492 infection. *Emerging microbes & infections*. 2019;8(1):760-72. Epub 2019/05/28. doi:  
493 10.1080/22221751.2019.1620083. PubMed PMID: 31130102; PubMed Central PMCID:  
494 PMC6542157.
- 495 31. van Doremalen N, Haddock E, Feldmann F, Meade-White K, Bushmaker T, Fischer RJ, et al. A single  
496 dose of ChAdOx1 MERS provides protective immunity in rhesus macaques. *Science advances*.  
497 2020;6(24):eaba8399. Epub 2020/06/25. doi: 10.1126/sciadv.aba8399. PubMed PMID: 32577525;  
498 PubMed Central PMCID: PMC7286676.
- 499 32. Li K, Li Z, Wohlford-Lenane C, Meyerholz DK, Channappanavar R, An D, et al. Single-Dose,  
500 Intranasal Immunization with Recombinant Parainfluenza Virus 5 Expressing Middle East Respiratory  
501 Syndrome Coronavirus (MERS-CoV) Spike Protein Protects Mice from Fatal MERS-CoV Infection. *mBio*.  
502 2020;11(2). Epub 2020/04/09. doi: 10.1128/mBio.00554-20. PubMed PMID: 32265331; PubMed Central  
503 PMCID: PMC7157776.
- 504 33. Feng L, Wang Q, Shan C, Yang C, Feng Y, Wu J, et al. An adenovirus-vectored COVID-19 vaccine  
505 confers protection from SARS-COV-2 challenge in rhesus macaques. *Nat Commun*. 2020;11(1):4207. Epub  
506 2020/08/23. doi: 10.1038/s41467-020-18077-5. PubMed PMID: 32826924; PubMed Central PMCID:  
507 PMC7442803 as Chief Scientific Advisor for Guangzhou nBiomed Ltd. The remaining authors declare  
508 no competing interests.
- 509 34. Richardson JS, Pillet S, Bello AJ, Kobinger GP. Airway delivery of an adenovirus-based Ebola virus  
510 vaccine bypasses existing immunity to homologous adenovirus in nonhuman primates. *J Virol*.  
511 2013;87(7):3668-77. Epub 2013/01/11. doi: 10.1128/jvi.02864-12. PubMed PMID: 23302894; PubMed  
512 Central PMCID: PMC3624216.
- 513 35. Lemiale F, Kong WP, Akyürek LM, Ling X, Huang Y, Chakrabarti BK, et al. Enhanced mucosal  
514 immunoglobulin A response of intranasal adenoviral vector human immunodeficiency virus vaccine and  
515 localization in the central nervous system. *J Virol*. 2003;77(18):10078-87. Epub 2003/08/28. doi:  
516 10.1128/jvi.77.18.10078-10087.2003. PubMed PMID: 12941918; PubMed Central PMCID:  
517 PMC224584.
- 518 36. Van Kampen KR, Shi Z, Gao P, Zhang J, Foster KW, Chen DT, et al. Safety and immunogenicity of  
519 adenovirus-vectored nasal and epicutaneous influenza vaccines in humans. *Vaccine*. 2005;23(8):1029-36.  
520 Epub 2004/12/29. doi: 10.1016/j.vaccine.2004.07.043. PubMed PMID: 15620476.
- 521

## 522 **ACKNOWLEDGEMENTS**

523 We acknowledge Krzysztof Hyc for help with the Hamamatsu NanoZoomer slide  
524 scanning system. We also thank Amy Dillard for help with the serum collections from the animals  
525 and Ali Ellebedy and Jackson Turner for help with antibody ELISA and recombinant protein. We  
526 thank Drs. Susan Cook and Ken Boschert for support of the COVID-19 research. This study was  
527 funded by NIH contracts and grants (R01 AI157155, 75N93019C00062, U01 AI151810,  
528 HHSN272201400018C, and HHSN272201700060C). J.B.C. is supported by a Helen Hay  
529 Whitney Foundation postdoctoral fellowship.

530

## 531 **AUTHOR CONTRIBUTIONS**

532 T.L.B., and T.L.D. performed the animal experiments. A.O.H. upscaled and purified the  
533 ChAd vectors. A.O.H., A.C.M.B., and J.B.C. performed the serological analysis. H.H., T.L.B., and  
534 T.L.D. performed viral load analysis by quantitative RT-PCR, focus forming or plaque assay.  
535 T.L.D. developed and validated primer-probes sets for Syrian hamster genes and performed the  
536 host gene expression assays. M. J. H. performed the histology analysis. A.S., X.J. and R.K.  
537 performed the histology and RNA-ISH on the hamster heads. A.C.M.B. performed RNA-ISH on  
538 the hamster lungs. A.L.B. and J.B.C. provided quantitative PCR reagents and protocols. Y.N.D.,  
539 H.Z., L.J.A., and D.H.F. provided recombinant proteins for serological analysis. M.S.D. and  
540 A.C.M.B. provided supervision and acquired funding. A.C.M.B. wrote the initial draft, with the other  
541 authors providing editorial comments.

542

## 543 **COMPETING FINANCIAL INTERESTS**

544 M.S.D. is a consultant for Inbios, Vir Biotechnology, NGM Biopharmaceuticals, and  
545 Carnival Corporation and on the Scientific Advisory Board of Moderna and Immunome. The  
546 Diamond laboratory has received unrelated funding support in sponsored research agreements  
547 from Moderna, Vir Biotechnology, and Emergent BioSolutions. The Boon laboratory has received

548 unrelated funding support in sponsored research agreements from AI Therapeutics, GreenLight  
549 Biosciences Inc., AbbVie Inc., and Nano targeting & Therapy Biopharma Inc. M.S.D. and A.O.H.  
550 have filed a disclosure with Washington University for possible commercial development of ChAd-  
551 SARS-CoV-2.

552 **FIGURES**

553 **Figure 1: Development of the SARS-CoV-2 hamster model.** (A) Mean  $\pm$  standard deviation  
554 (SD) weight loss or weight gain of uninfected (n = 3) or SARS-CoV-2 infected (n = 21). (B) Daily  
555 food intake of uninfected and infected hamsters. Data points for the uninfected hamsters (n = 3  
556 per day) were recorded for 14 days and plotted. For infected hamsters, food intake 1 to 10 dpi  
557 was recorded (\*\*\*\*  $P < 0.0001$ , \*\*\*  $P < 0.001$  by ANOVA with Dunnett's multiple comparison  
558 against the uninfected hamsters). (C) Infectious virus titer was quantified by FFA from  
559 homogenates of the left lung lobe at indicated time points. Each dot is an individual hamster and  
560 bars indicate median values (dotted line is the limit of detection). (D) Lung viral RNA was  
561 quantified in the left lung lobe at indicated time points after infection. Each dot is an individual  
562 hamster and bars indicate median values (dotted line is the limit of detection). (E) Pathology score  
563 of the lungs from infected hamsters. <10% affected = 1, >10% but <50% = 2, >50% = 3. Each  
564 lobe was scored, and the average score was plotted per animals. The solid line is the average  
565 score per day for RNA *in situ* hybridization (red line and dots) or inflammation (blue line and dots).  
566 (F) Representative images at 5x and 20x magnification of H & E staining of SARS-CoV-2 infected  
567 hamsters sacrificed at different time points after inoculation (n = 5 for 2 dpi, n = 3 for 3 dpi, n = 3  
568 for 4 dpi, n = 5 for 5 dpi, n = 2 for 8 dpi, n = 3 for 14 dpi, n = 3 for uninfected). (G) Serum S protein  
569 specific IgG(H+L) responses in SARS-CoV-2 infected hamsters. Each color is a different day after  
570 infection. (C-D) Bars indicate median values, and dotted lines are the LOD of the assays.

571

572 **Figure 2: Humoral immune response following IN and IM immunization.** (A-C) Anti-S protein-  
573 specific serum IgG(H+L) titers in hamsters immunized IN with ChAd-Control (A) or with ChAd-  
574 SARS-CoV-2-S IM (B) or IN (C). Each line is an individual animal. (D-G) Receptor binding domain  
575 (RBD)-specific serum IgM titers in hamsters immunized IN with ChAd-Control (D), or with ChAd-  
576 SARS-CoV-2-S IM (E) or IN (F). Each line is an individual animal. (G-H) IC<sub>50</sub> values for S protein



577 specific or RBD specific IgG(H+L) (**G**) or IgG2/IgG3 (**H**) serum antibodies in hamsters vaccinated  
578 IM (blue symbols) or IN (red symbols) with ChAd-Control (open symbols) or ChAd-SARS-CoV-2-  
579 S (closed symbols). (\*\*\*\*  $P < 0.0001$ , \*\*\*  $P < 0.001$  by Mann-Whitney test with a Bonferroni  
580 correction for multiple comparisons). (**I**) SARS-CoV-2 serum neutralizing titer, measured by  
581 FRNT, in hamsters vaccinated IM or IN with ChAd-Control or ChAd-SARS-CoV-2-S. (\*\*\*\*  $P <$   
582  $0.0001$ , \*  $P < 0.05$  by Mann-Whitney test with a Bonferroni correction for multiple comparisons).  
583 (**G-I**) Bars indicate median values, and dotted lines are the LOD of the assays.

584

585 **Figure 3: IN immunization offers superior protection against challenge with SARS-CoV-2.**

586 Twenty-eight days after a single IM (blue symbols) or IN (red symbols) vaccination with ChAd-  
587 Control (open symbols) or ChAd-SARS-CoV-2-S (closed symbols), hamsters were challenged  
588 with  $2.5 \times 10^5$  PFU of SARS-CoV-2, and nasal swabs (**A** and **B**) and lungs (**C** and **D**) were  
589 collected for analysis of viral RNA levels by qPCR (**A** and **C**) and infectious virus by plaque assay  
590 (**B** and **D**). (\*\*\*\*  $P < 0.0001$ , \*\*\*  $P < 0.001$ , \*\*  $P < 0.01$ , \*  $P < 0.05$ , ns = not significant by Mann-  
591 Whitney test with a Bonferroni correction for multiple comparisons). (**E**) Mean  $\pm$  SD of weight  
592 loss/gain in SARS-CoV-2 challenged hamsters (n = 4 per group). (**F**) SARS-CoV-2 N protein  
593 serum titer, measured by ELISA, in hamsters vaccinated IM or IN with ChAd-Control or ChAd-  
594 SARS-CoV-2-S. (**A-D** and **F**) Bars indicate median values, and dotted lines are the limit of  
595 detection of the assays.

596

597 **Figure 4: IN immunization offers superior protection against SARS-CoV-2 infection of the**

598 **nasal epithelium.** (**A**) RNA *in situ* hybridization (ISH) for SARS-CoV-2 viral RNA in hamster lung  
599 sections. Representative images of the ChAd-Control (IM), ChAd-SARS-CoV-2-S (IM) and ChAd-  
600 SARS-CoV-2-S (IN) sections. (**B**) Comparison of RNA-ISH staining between groups of hamsters.  
601 Each lobe was scored according to the following system, <10% RNA-positive = 1, >10% but <50%

602 RNA-positive = 2, >50% RNA-positive = 3, and the average score was plotted per animals. (\*\*  $P$   
603 < 0.01, ns = not significant by Mann-Whitney U test with a Bonferroni correction for multiple  
604 comparisons). (C) Representative images of sagittal sections of hamster heads infected with  
605 SARS-CoV-2 for 2 days or uninfected control. RNA-ISH was performed on the sections and  
606 SARS-CoV-2 viral RNA was detected in the nasal turbinate. (D) Detection of SARS-CoV-2 viral  
607 by RNA-ISH in sagittal sections of hamster heads from the immunized and SARS-CoV-2  
608 challenged animals.

609

610 **Figure 5: ChAd-SARS-CoV-2 immunization ameliorates inflammatory gene expression**  
611 **following SARS-CoV-2 challenge.** Inflammatory gene-expression ( $n = 22$ ) was quantified by  
612 RT-PCR in RNA extracted from lung homogenates 3 dpi (primer and probe sequences are in  
613 Table 1). (A) Fold increase in gene-expression for ChAd-Control immunized (IN in red and IM in  
614 black) and SARS-CoV-2 challenged hamsters. (B)  $\Delta\Delta\text{Ct}$ -values for *Ifit3*, *Irf7*, *Ccl5*, *Cxcl10*, *Ddx58*  
615 and *Ccl3* in ChAd-Control (open symbols) and ChAd-SARS-CoV-2-S (closed symbols)  
616 immunized and SARS-CoV-2 challenged animals 3 dpi. (ns = not significant, \*\*\*\*  $P < 0.0001$ , \*\*\*  
617  $P < 0.001$ , \*\*  $P < 0.01$  by one-way ANOVA with a Šidák correction for multiple comparisons).  
618 Each dot is an individual animal from two experiments. Bars indicate average values.

619

620 **SUPPLEMENTARY FIGURES**

621 **Supplementary Figure 1: RNA *in situ* (ISH) hybridization on lung tissue sections from**  
622 **SARS-CoV-2 infected hamsters.** Representative images at 0.5x (A), 5x (B), and 20x (B)  
623 magnification of RNA-ISH of SARS-CoV-2 infected hamsters sacrificed at different time points  
624 after inoculation (n = 5 for 2 dpi, n = 3 for 3 dpi, n = 3 for 4 dpi, n = 5 for 5 dpi, n = 2 for 8 dpi, n =  
625 3 for 14 dpi, n = 3 for uninfected).

626  
627 **Supplementary Figure 2: IgG2/IgG3 serum antibody titers against recombinant spike**  
628 **protein and the receptor binding domain (RBD) of the spike protein. (A-B)** S protein-specific  
629 serum IgG2/IgG3 titers in hamsters immunized IM (A) or IN (B) with ChAd-Control. (C-D) RBD-  
630 specific serum IgG2/IgG3 titers in hamsters immunized IM (C) or IN (D) with ChAd-Control. (E-F)  
631 S protein-specific serum IgG2/IgG3 titers in hamsters immunized IM (E) or IN (F) with ChAd-  
632 SARS-CoV-2-S. (G-H) RBD-specific serum IgG2/IgG3 titers in hamsters immunized IM (C) or IN  
633 (D) with ChAd-SARS-CoV-2-S. Each line is an individual animal.

634  
635 **Supplementary Figure 3: IgG(H+L) serum antibody titers against SARS-CoV-2**  
636 **nucleoprotein 10 days after infection in vaccinated and control hamsters.** Nucleoprotein-  
637 specific serum antibody titers in ChAd-Control (A-B) or ChAd-SARS-CoV-2-S (C-D) immunized  
638 and SARS-CoV-2 challenged Golden Syrian hamsters 10 days post challenge. Each line is an  
639 individual animal.

640  
641 **Supplementary Figure 4: Histological and RNA *in situ* (ISH) hybridization analysis of lung**  
642 **tissue sections from ChAd-Control vaccinated and SARS-CoV-2 challenge hamsters.**  
643 Representative images at 5x magnification of H & E staining and RNA-ISH of hamsters  
644 immunized IM (n = 6) and IN (n = 6) with ChAd-Control and challenged 28 days later with SARS-

645 CoV-2. Lungs were collected 3 days post challenge, fixed in 10% formalin and paraffin embedded  
646 prior to sectioning and staining.

647

648 **Supplementary Figure 5: Histological and RNA *in situ* (ISH) hybridization analysis of lung**  
649 **tissue sections from ChAd-SARS-CoV-2-S vaccinated and SARS-CoV-2 challenge**  
650 **hamsters.** Representative images at 5x magnification of H & E staining and RNA-ISH of hamsters  
651 immunized IM (n = 6) and IN (n = 6) with ChAd-SARS-CoV-2S and challenged 28 days later with  
652 SARS-CoV-2. Lungs were collected 3 days post challenge, fixed in 10% formalin and paraffin  
653 embedded prior to sectioning and staining.

654

655 **Supplementary Figure 6: Immune correlates of vaccine-mediated protection SARS-CoV-2.**  
656 Correlations between % weight-loss/gain (3 dpi), RNA levels in the lungs and nasal swabs,  
657 infectious virus titers, serum antibody responses, serum virus neutralization titer, and  
658 inflammatory hamster gene expression were analyzed for all animals in the vaccine study using  
659 a Pearson correlation matrix. The top right side is the correlation coefficient and the bottom left  
660 side has the *P*-value for every combination (\*\*\*\*  $P < 0.0001$ , \*\*\*  $P < 0.001$ , \*\*  $P < 0.01$ , \*  $P < 0.05$   
661 by Pearson's correlation analysis).

662 **SUPPLEMENTARY TABLES**

663 **Supplementary Table 1: Primers and probe sets used to quantify gene expression in the**

664 **Golden Syrian hamster (*Mesocricetus auratus*).**

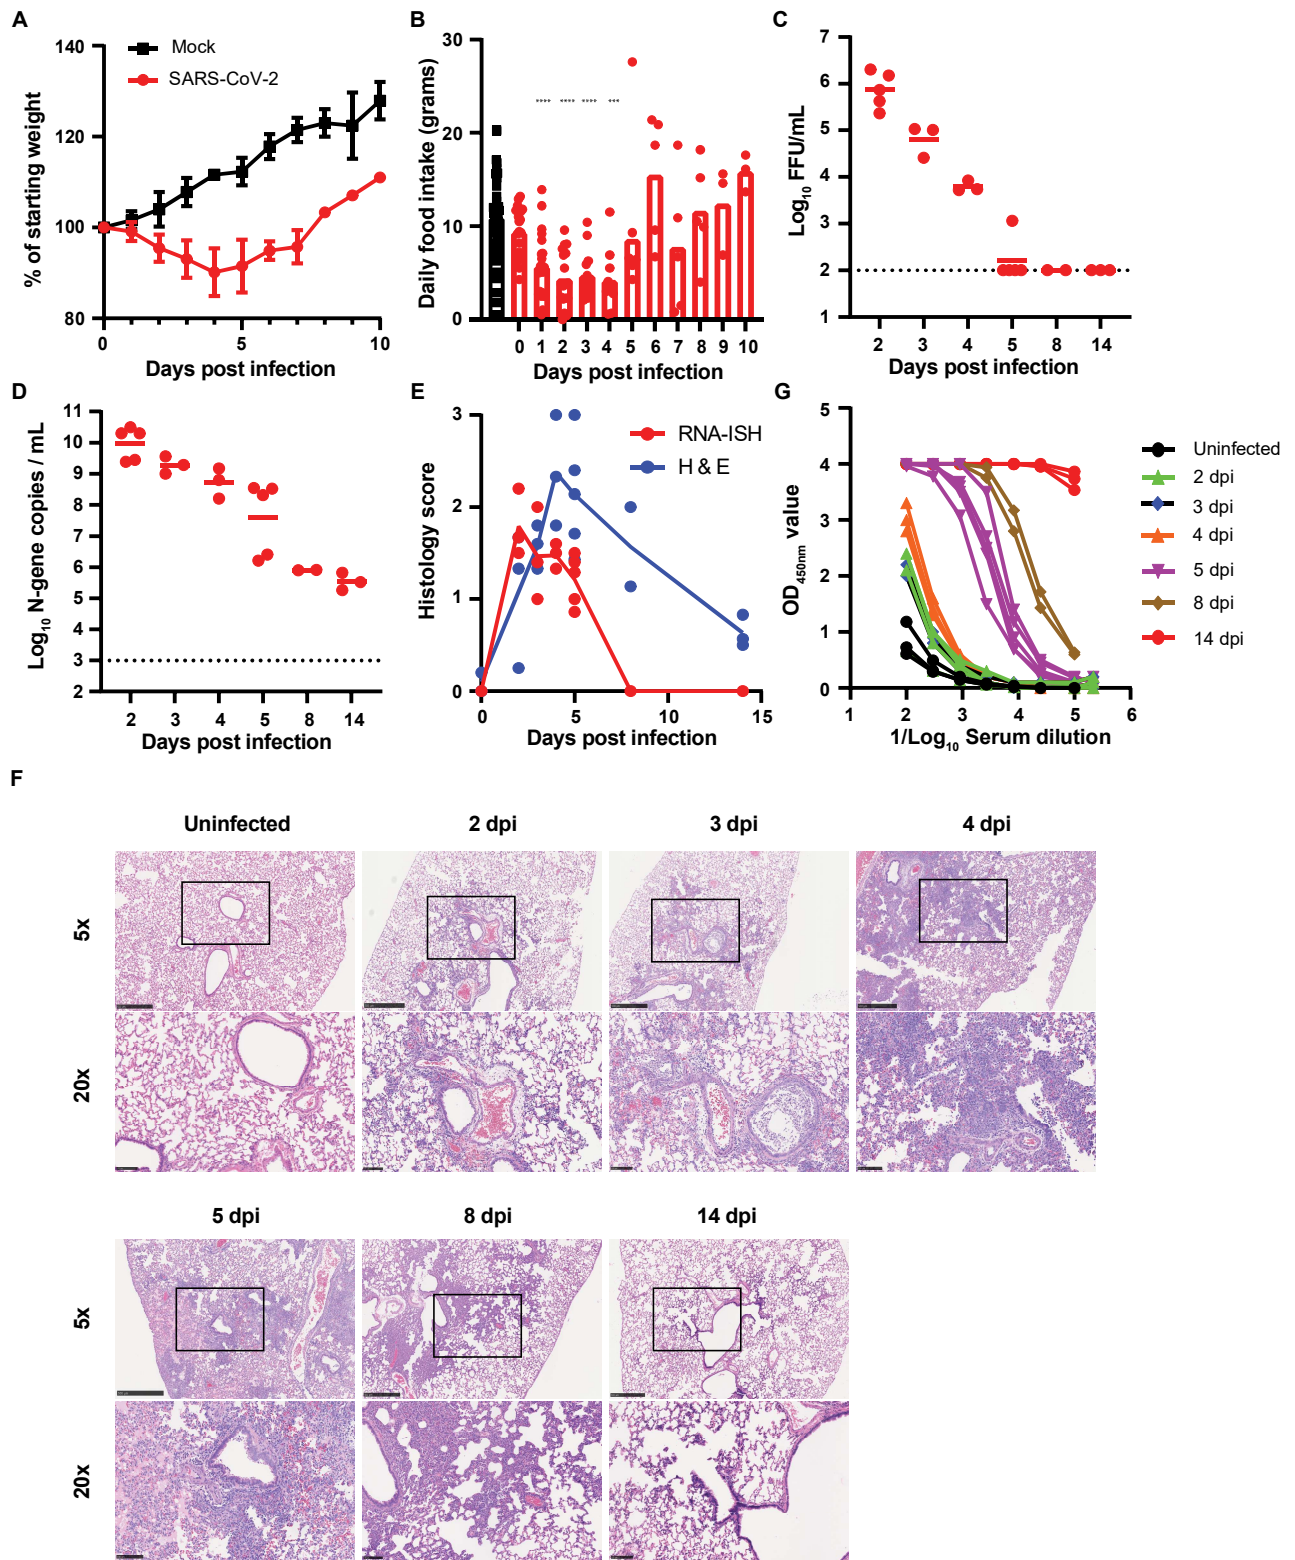

Figure 1

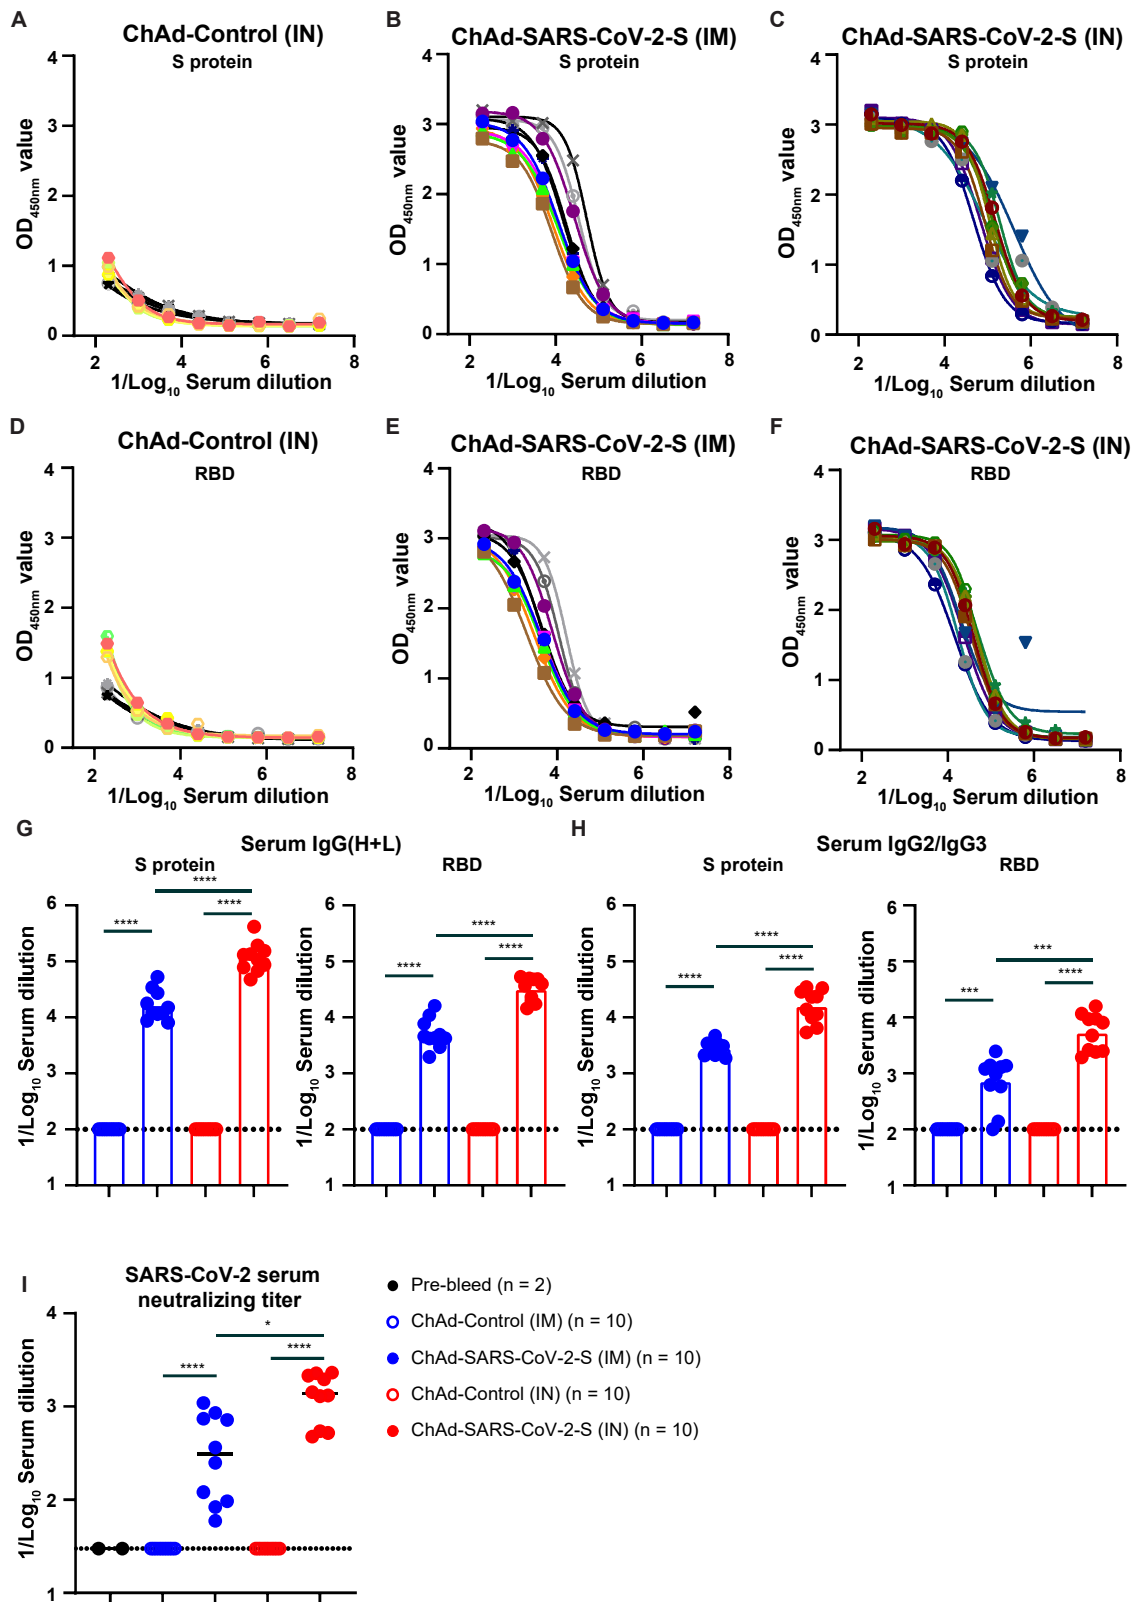

Figure 2

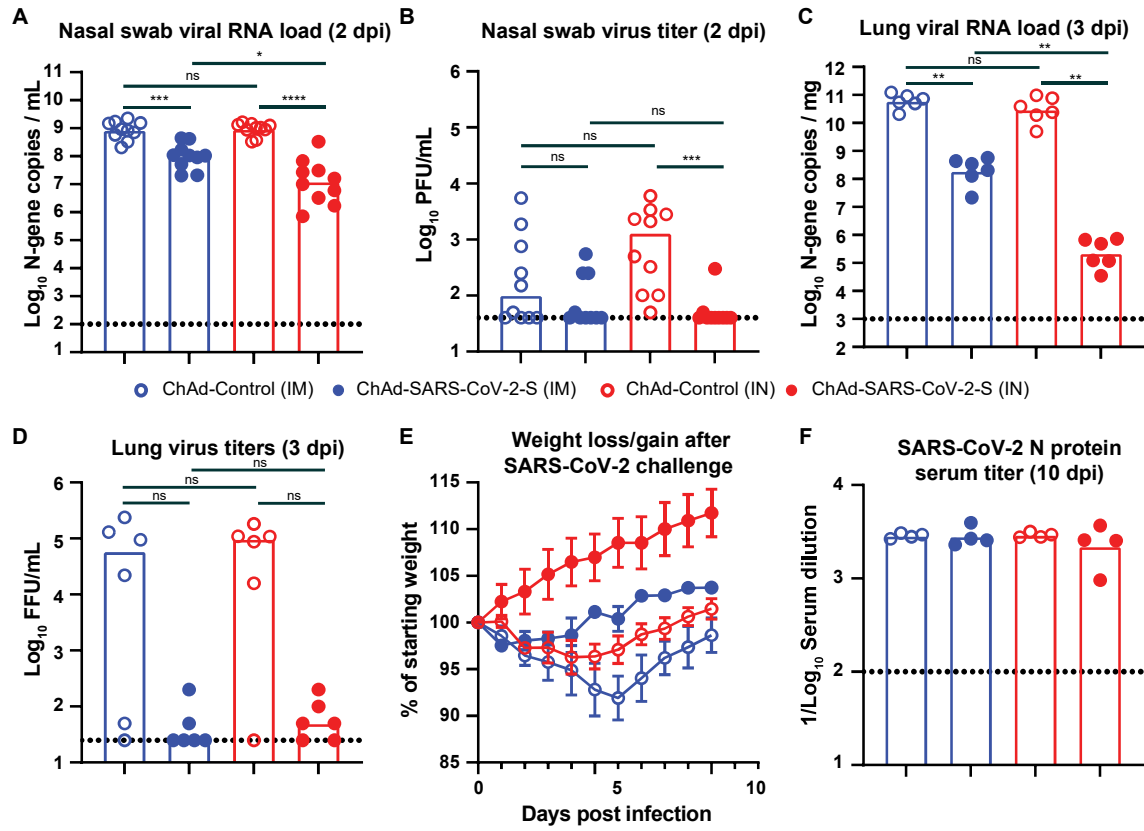

Figure 3



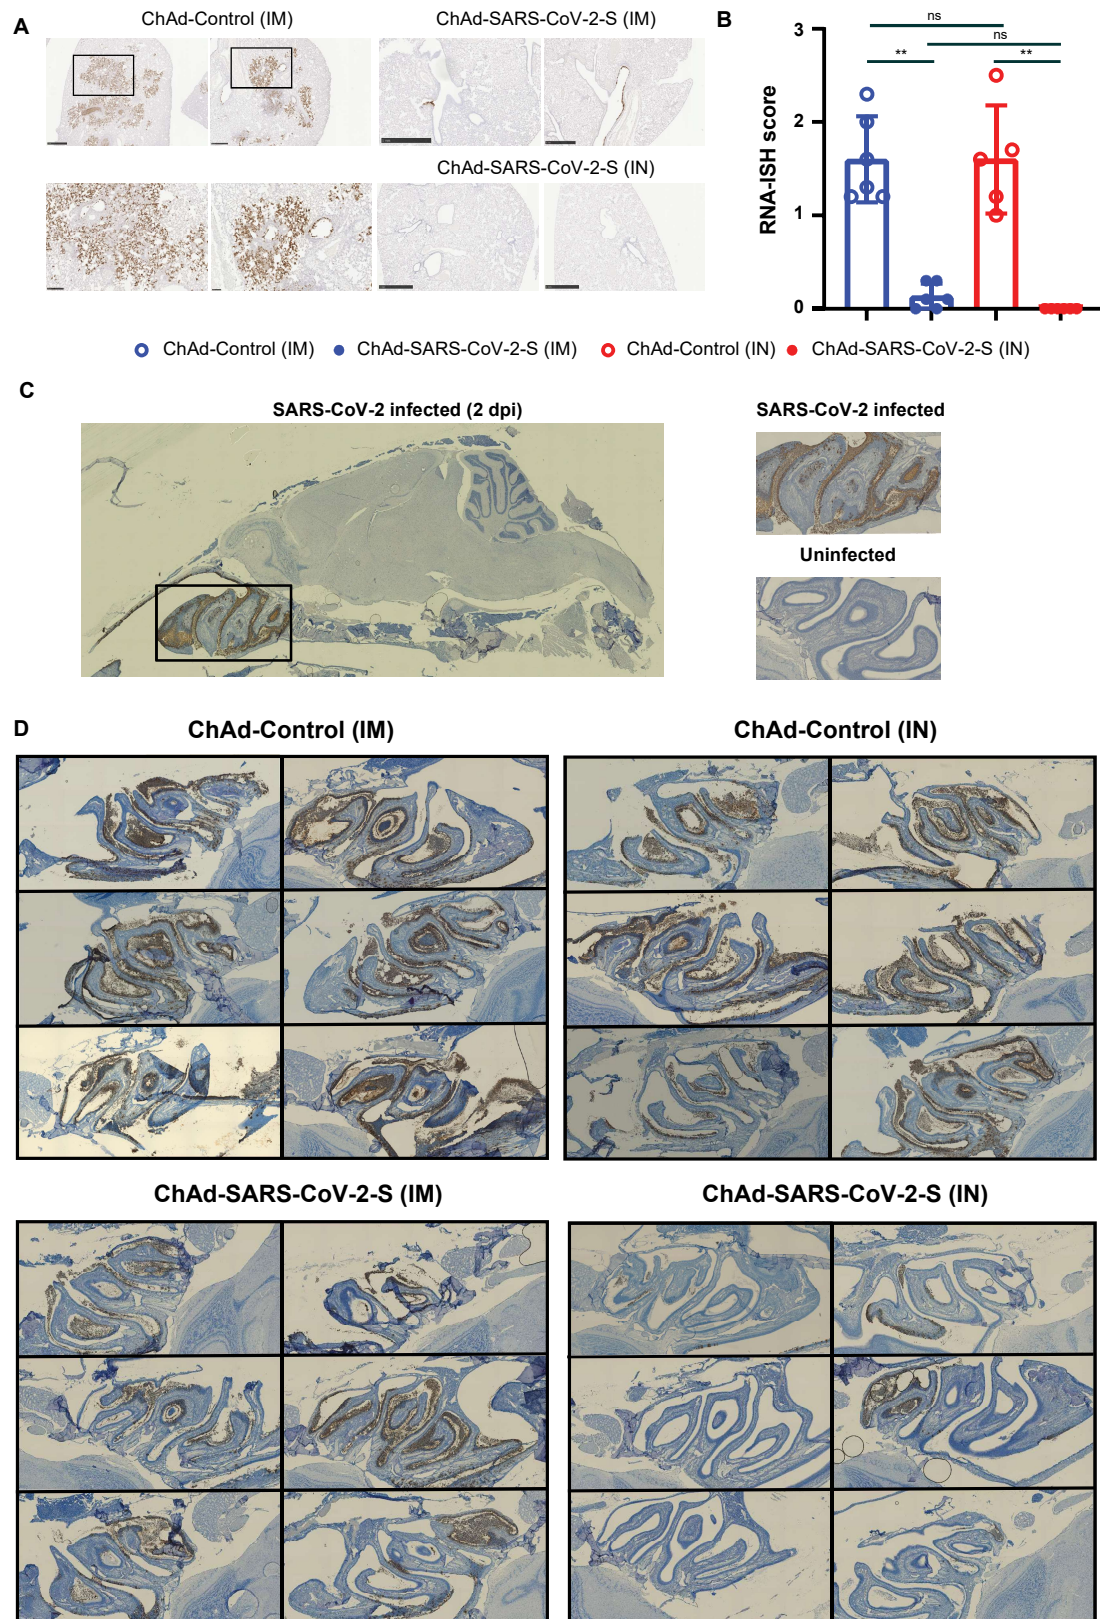

Figure 4

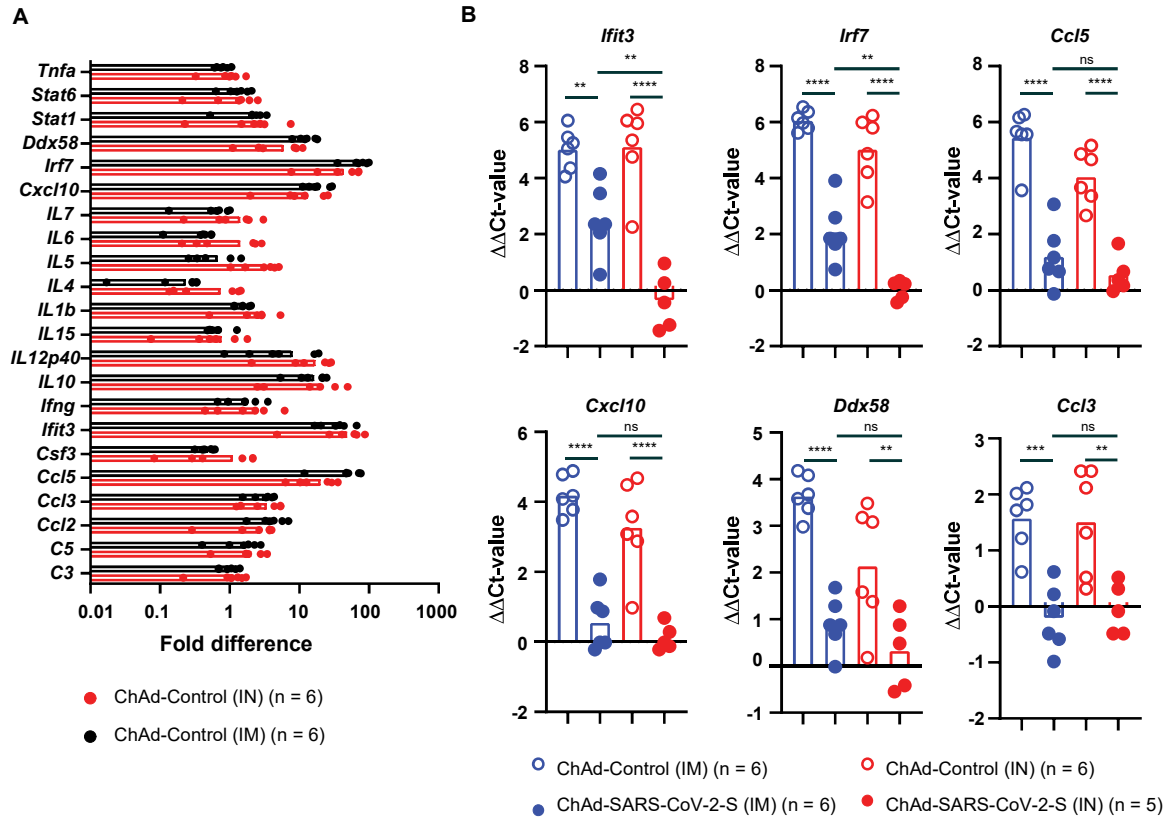

**Figure 5**

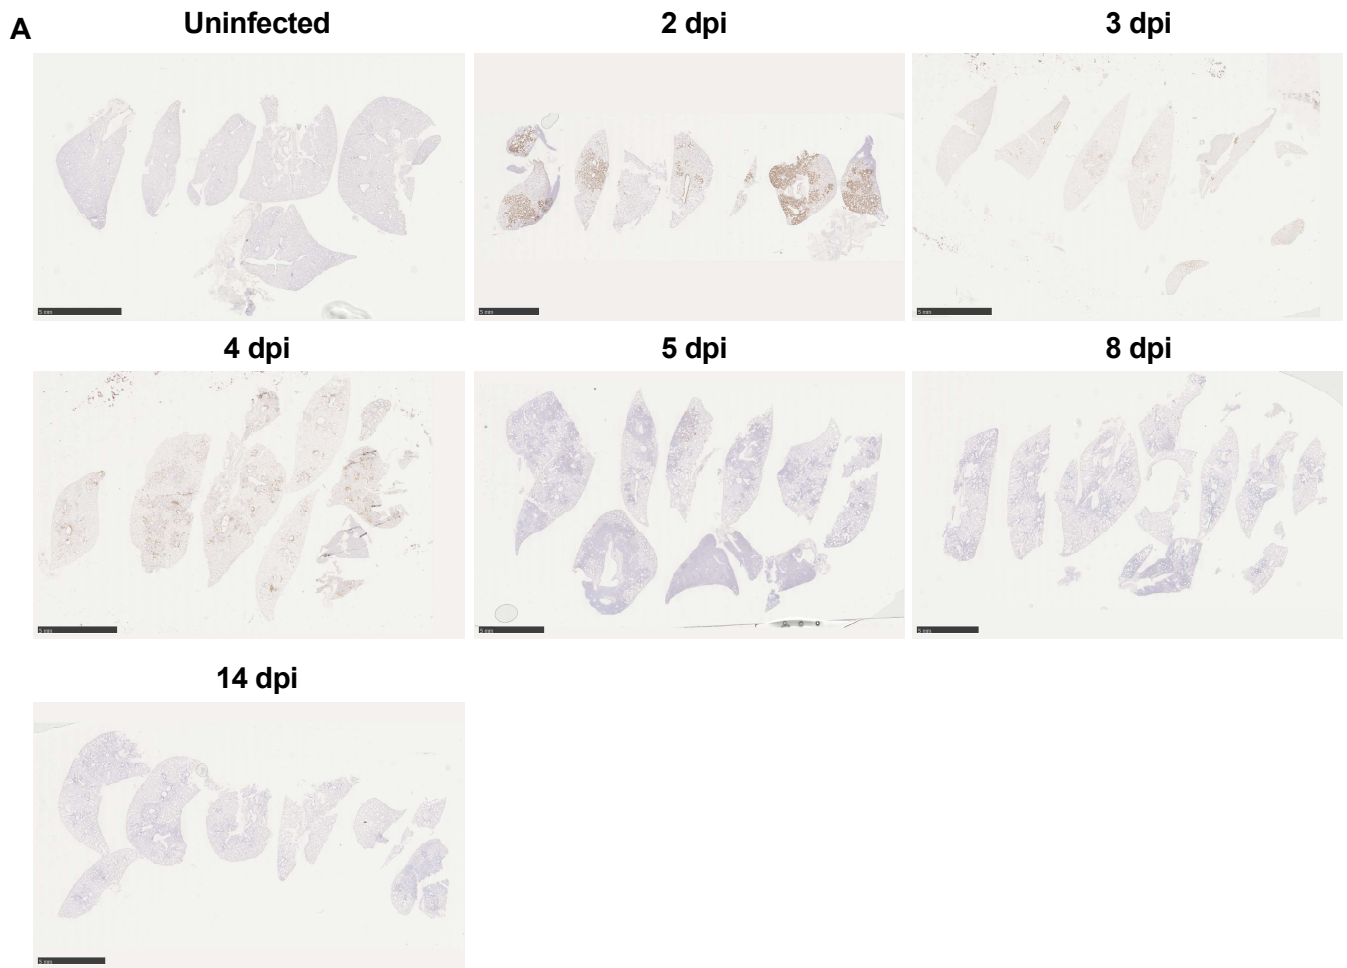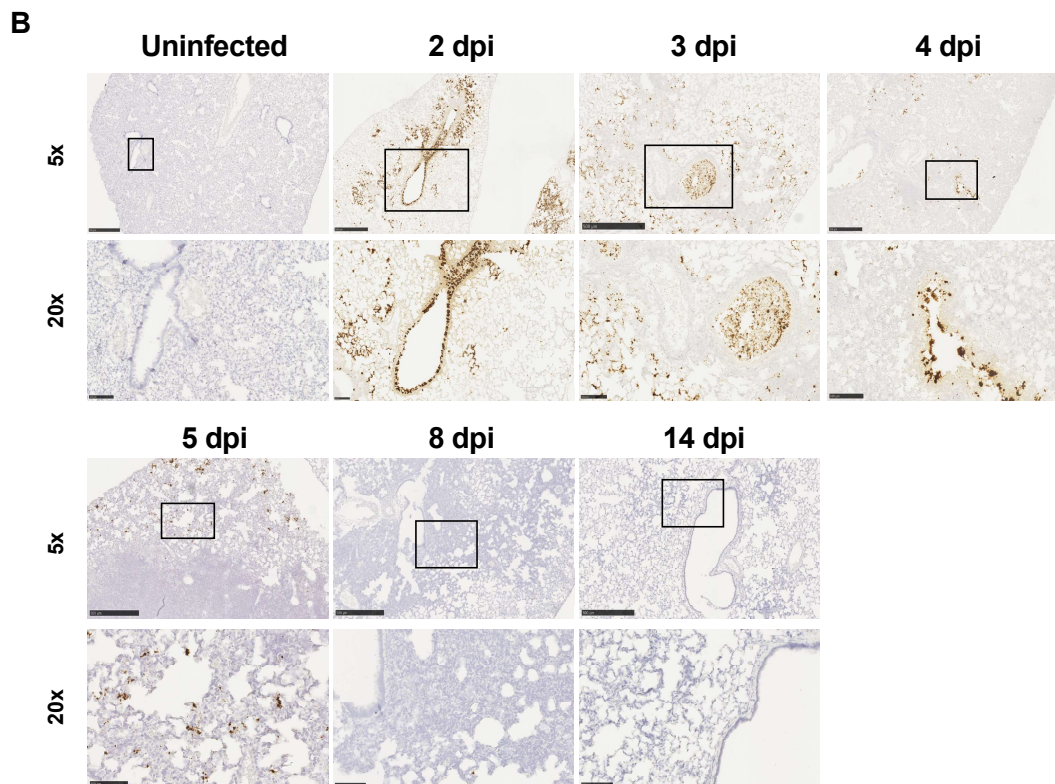

Figure S1

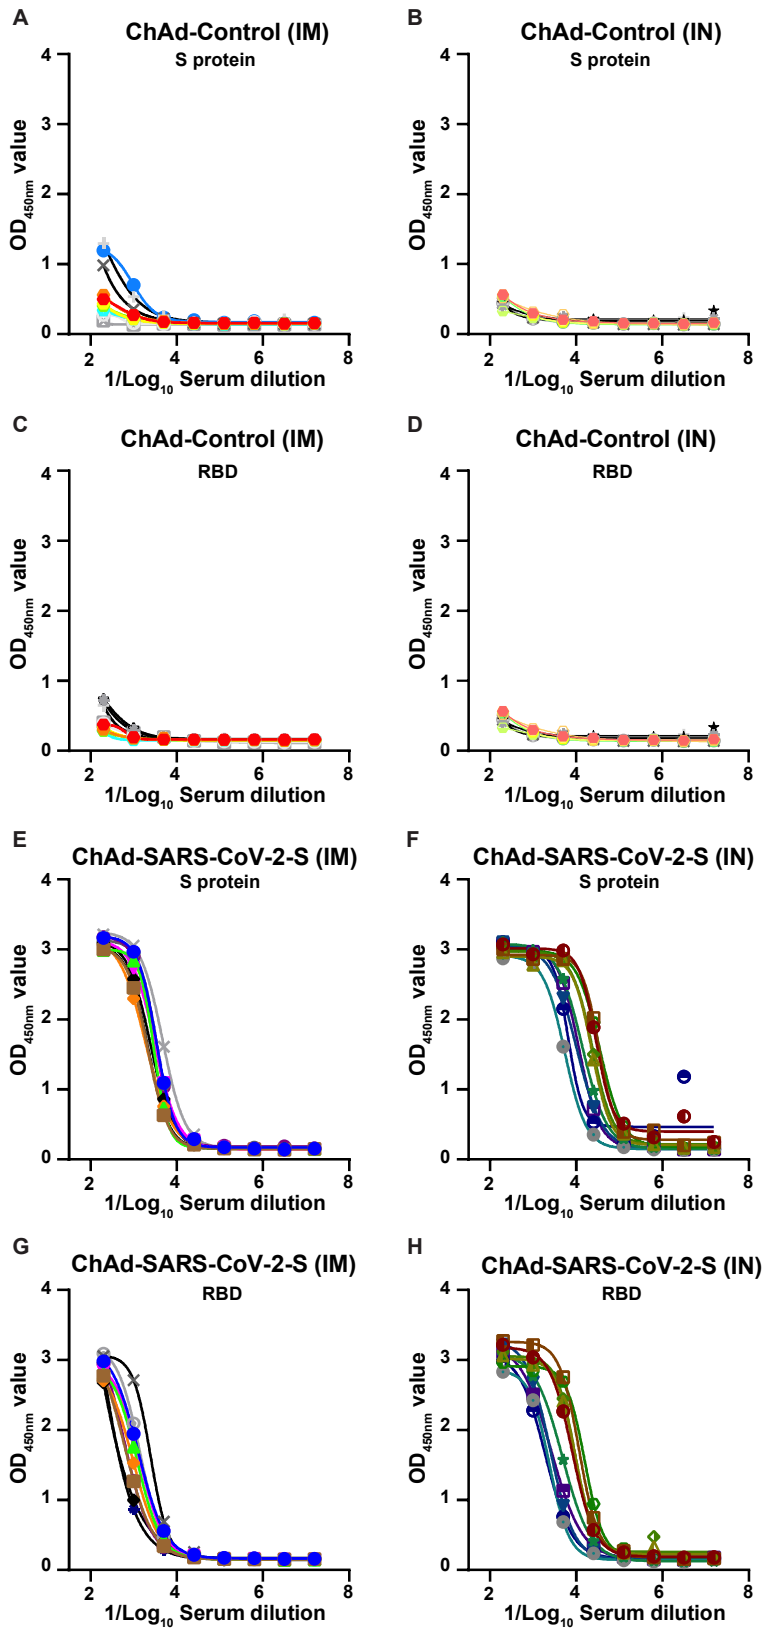

Figure S2

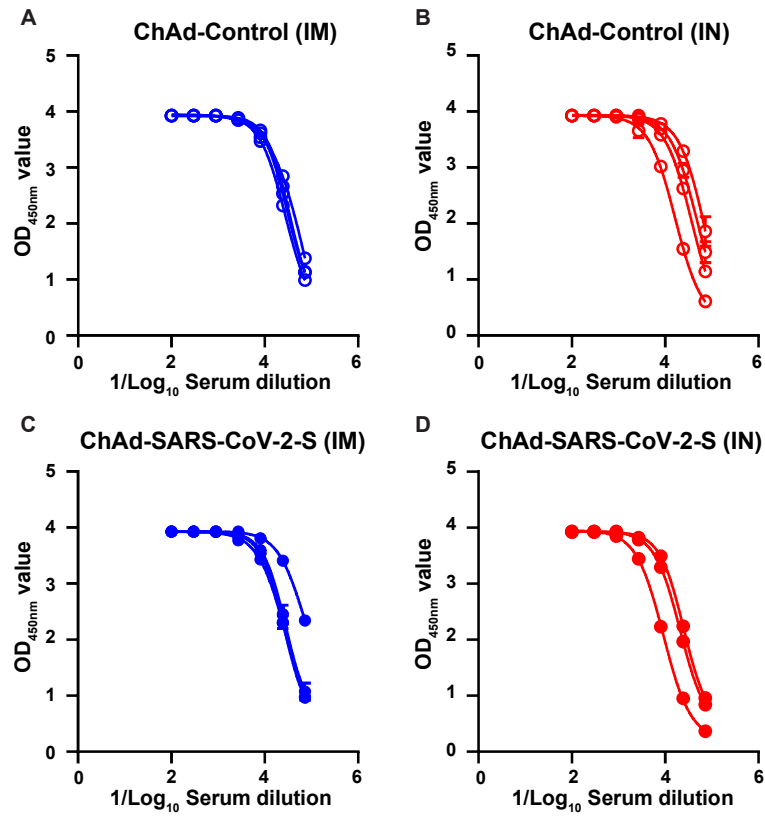

Figure S2

**A**

**ChAd-Control (IM)**

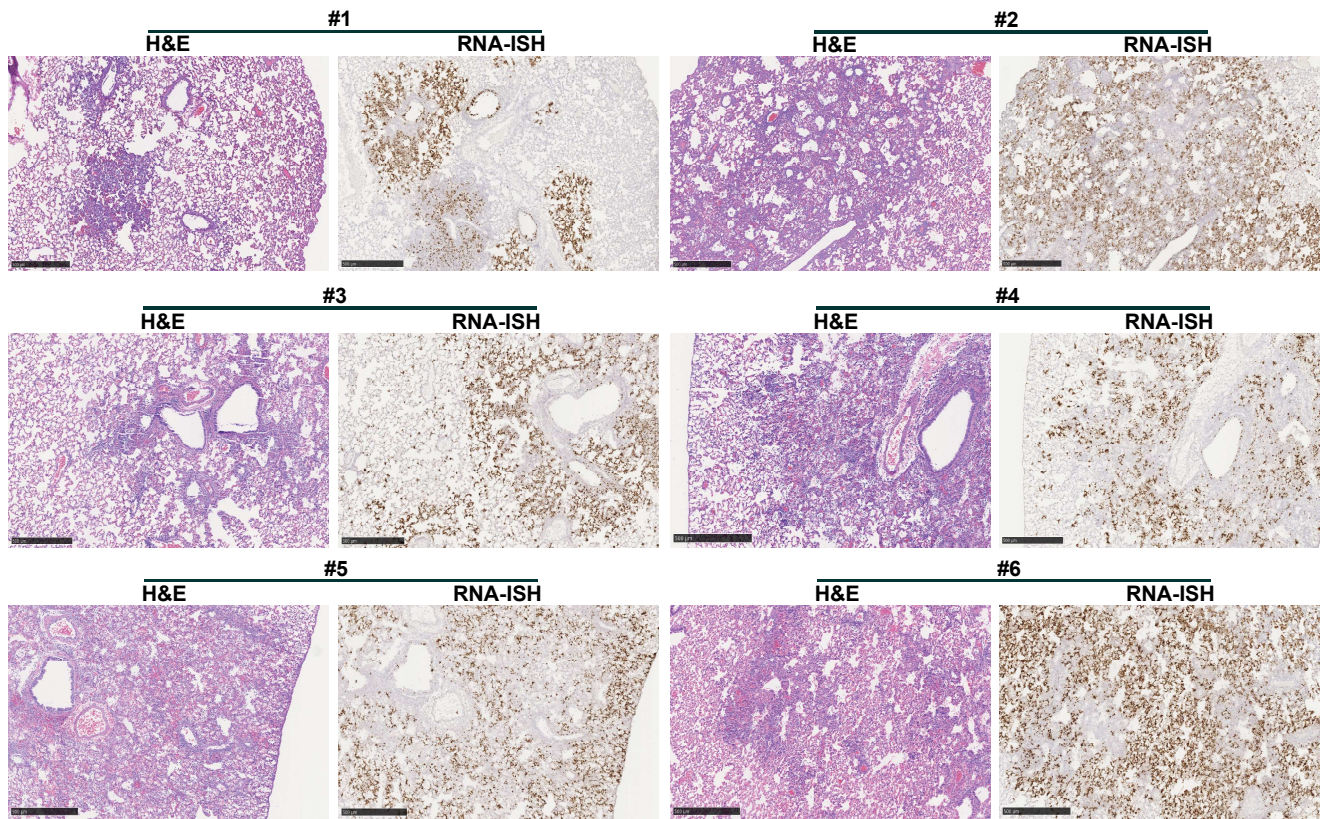

**B**

**ChAd-Control (IN)**

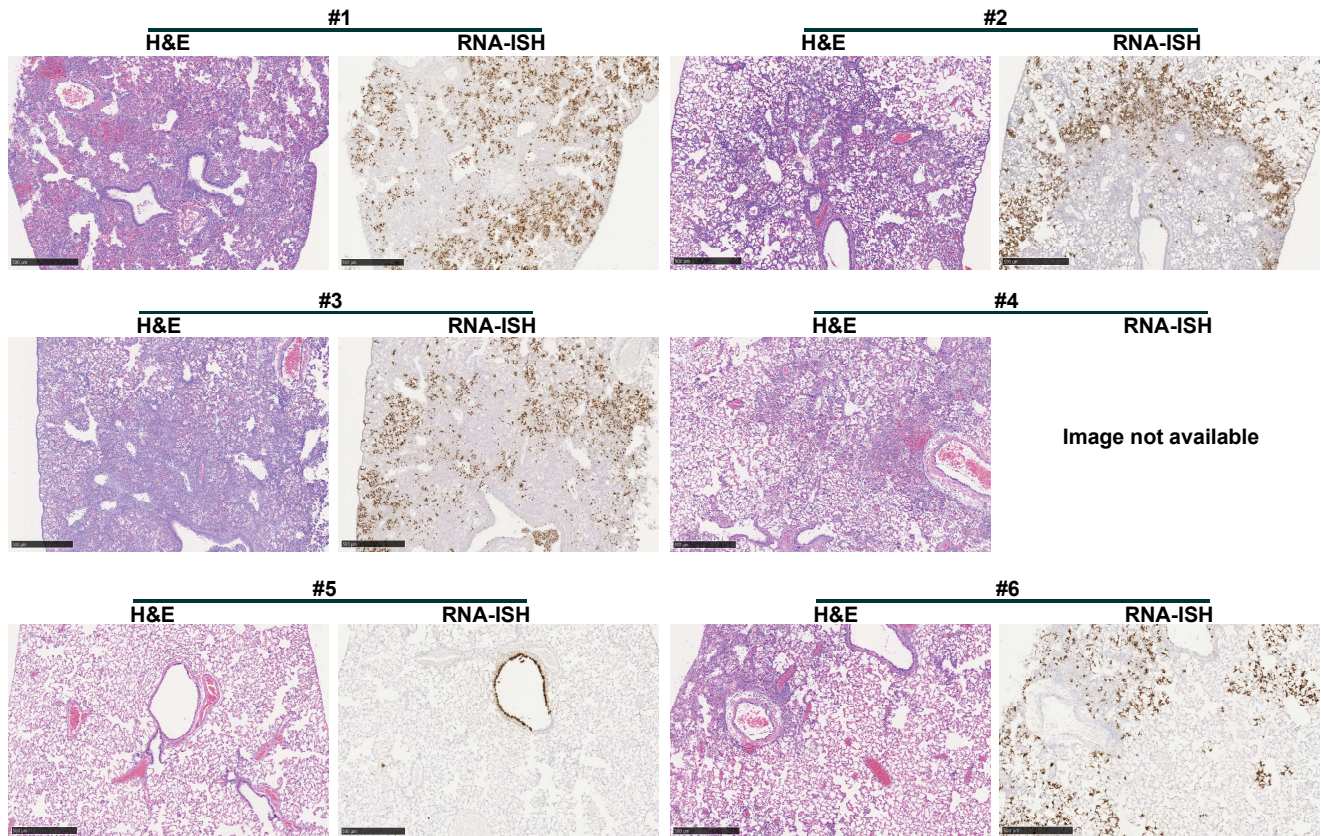

**Figure S4**

**A**

**ChAd-SARS-CoV-2-S (IM)**

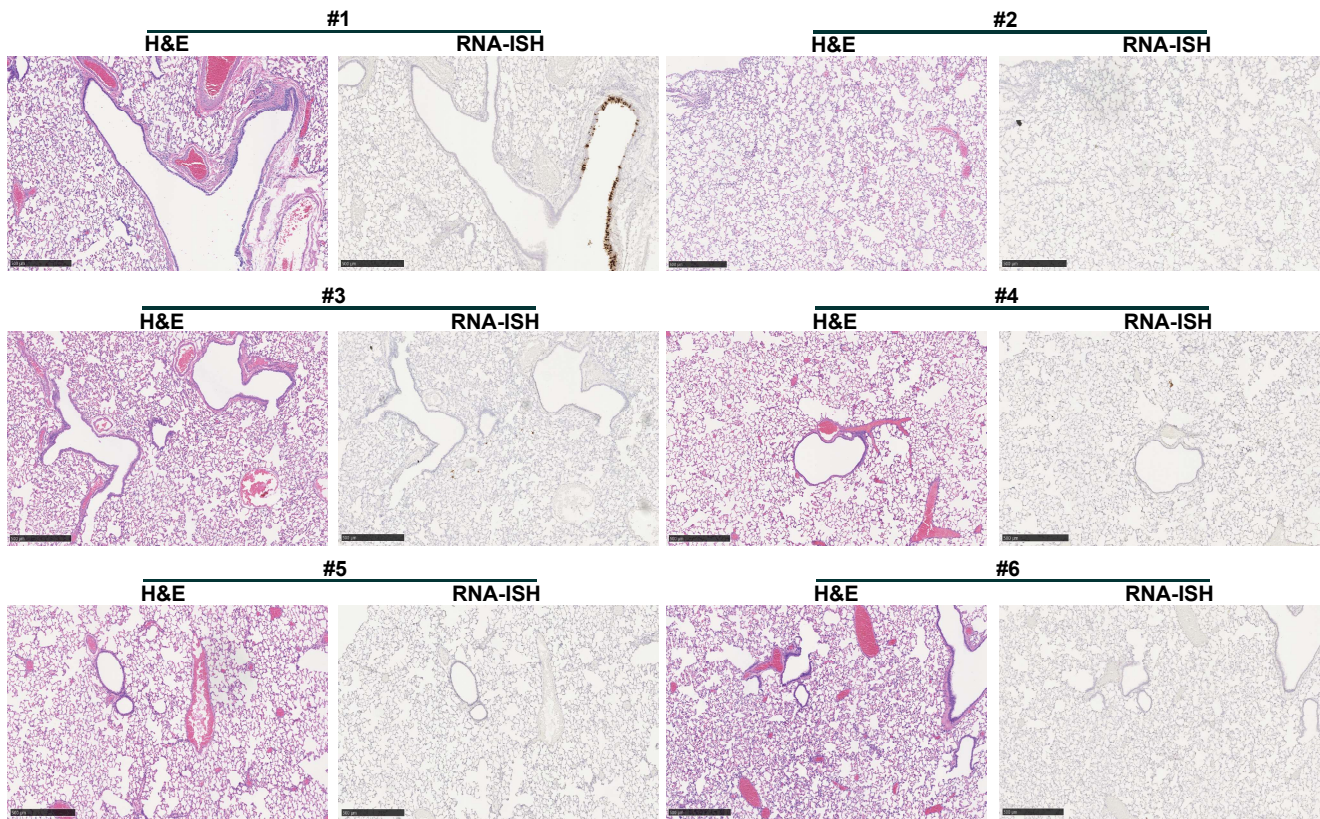

**B**

**ChAd-SARS-CoV-2-S (IN)**

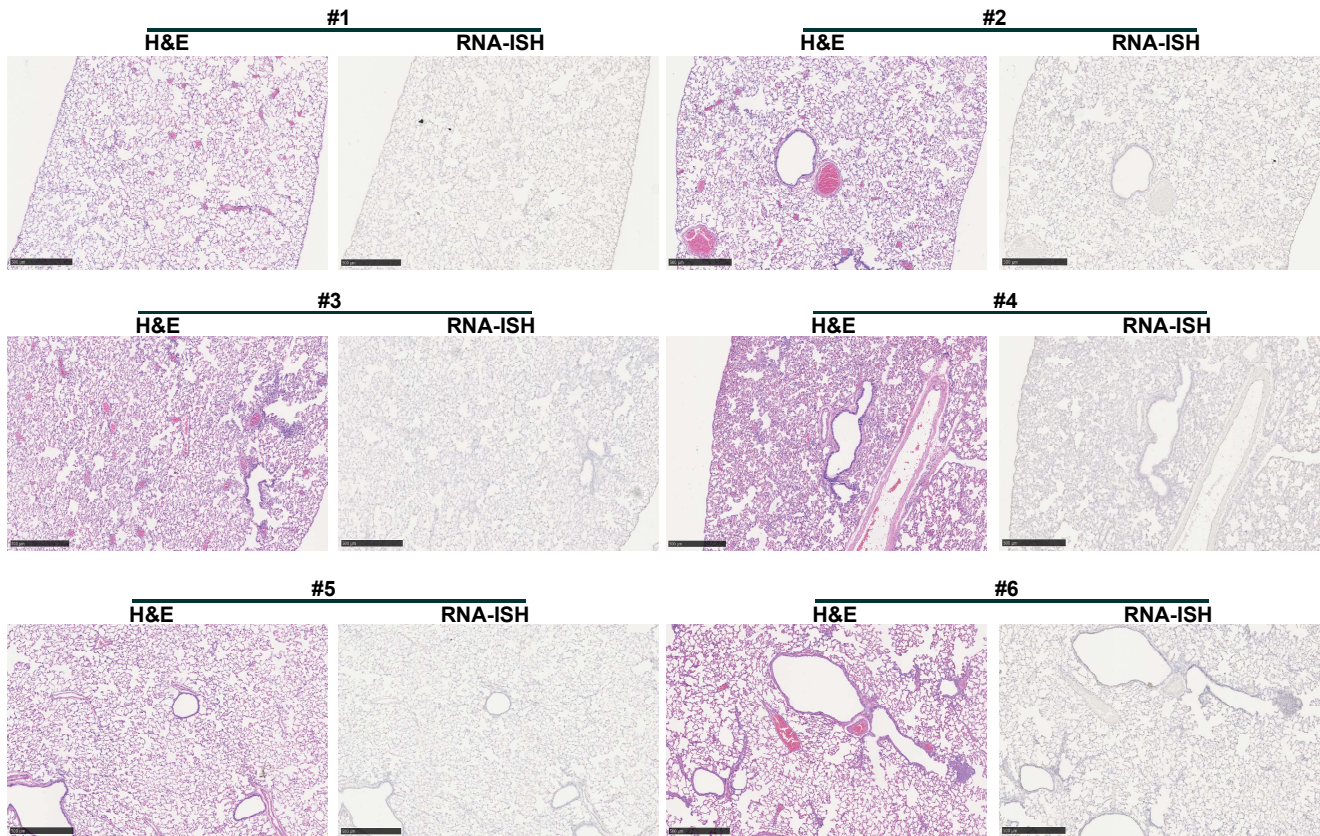

**Figure S5**

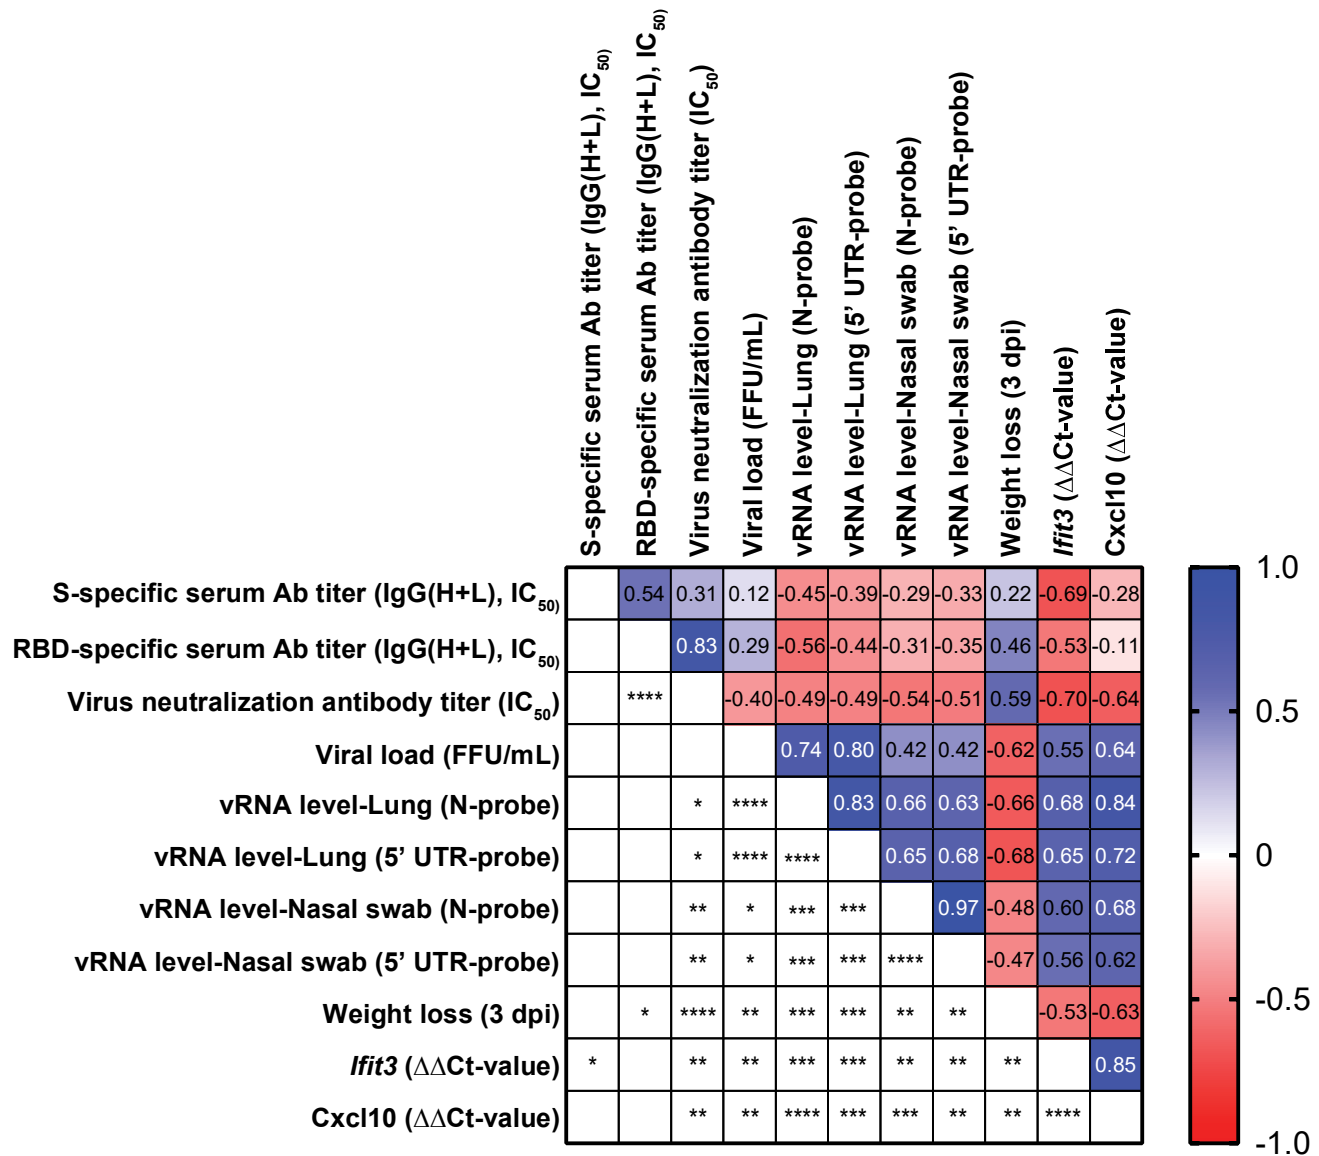

Figure S6



**Supplementary Table 1: Primer and probe sequences for gene-expression analysis in the Golden Syrian hamster (*Mesocricetus auratus*)**

| Gene           | Accession number               | Forward Primer          | Reverse Primer           | Probe                      | Exons spanned | Reference |
|----------------|--------------------------------|-------------------------|--------------------------|----------------------------|---------------|-----------|
| <i>Rpl18</i>   | <a href="#">XM_005084699.3</a> | GTTTATGAGTCGCACTAACCG   | TGTTCTCTCGGCCAGGAA       | TCTGTCCCTGTCCCGGATGATC     | 2             | 25        |
| <i>β2M</i>     | <a href="#">XM_005068531.3</a> | GGCTCACAGGGAGTTGTAC     | TGGGCTCCTCAGAGTTATG      | CTGCGACTGATAAATACGCCTGCA   | 1             | 25        |
| <i>C3</i>      | <a href="#">XM_021233717.1</a> | TCTCCATGATGACTGGCTTTG   | GGCTTTGGTCATCTCGTACTT    | ACACAAACGACCTGGAAGTCTGA    | 2             | in-house  |
| <i>C5</i>      | <a href="#">XM_021234075.1</a> | GGCTGACTCGGTTTGGATAA    | CACAGTTTGACCTGGAGAATAGA  | AGAGAAATGTGGCAACCAGCTCGA   | 2             | in-house  |
| <i>Ccl2</i>    | <a href="#">XM_005076967.3</a> | CTCACCTGCTGCTACTCATT    | CTCTCTTGTAGCTTGGTGATG    | CAGCAGCAAGTGTCCCAAAGAAGC   | 2             | in-house  |
| <i>Ccl3</i>    | <a href="#">NM_001281338.1</a> | CCTCTGCTGCTTCTTCTATG    | TGCCGTTTCTCTTGGTTAG      | TCCCGCAAATTCATCGCCGACTAT   | 2             | in-house  |
| <i>Ccl5</i>    | XM_005076936.3                 | TGCTTTGACTACCTCTCTTTAC  | GGTTCCTTCGGGTGACAAA      | TGCCTCGTGTTCACATCAAGGAGT   | 2             | in-house  |
| <i>Csf3</i>    | <a href="#">GDQJ01025619.1</a> | AATCAATCCATGGCTCAACTTTC | CTTCTTGTCTGTCCAGAGTG     | CACAGTAGCAGCTGTAGGGCCATC   | 2             | in-house  |
| <i>Ifit3</i>   | <a href="#">XM_021224964.1</a> | CTGATACCAACTGAGACTCCTG  | CTTCTGTCTTCTCGGATTAG     | ACCGTACAGTCCACACCAACTTT    | 2             | in-house  |
| <i>Ifng</i>    | <a href="#">NM_001281631.1</a> | TTGTTGCTGCGCTCACTC      | CCCTCCATTCACGACATCTAAG   | TACTGCCAGGGCACACTCATTGAA   | 2             | in-house  |
| <i>IL10</i>    | <a href="#">XM_005079860.2</a> | AGCGCTGCATCGATTCTC      | CGCCTTCTCTTGAGGCTTAT     | AAGGCTGTGGAACAGGTGAAGGAT   | 3             | in-house  |
| <i>IL12p40</i> | <a href="#">NM_001281689.1</a> | GAGGCCAGCACAAGTATAA     | AGTCAGGATACTCCAGGATAA    | ATCATCAAACCGACCCACCCAAA    | 2             | in-house  |
| <i>IL15</i>    | <a href="#">XM_005077725.3</a> | AGGCTGAGTTCTCCGTCTAA    | AGTGTGAAGAGCTGGCTATG     | TCAGAGAGGTCAGGAAAGGAGGTGT  | 2             | in-house  |
| <i>IL18</i>    | <a href="#">XM_005068610.3</a> | TTCCTGAACCTCGACAGTGAAAT | GCTTTGGAAACAGCTTCTCATC   | TCTTTGAGGTTGACGGGCTCCAAA   | 2             | in-house  |
| <i>IL4</i>     | <a href="#">AF046213</a>       | CCACGGAGAAAGACCTCATCTG  | GGGTCACCTCATGTTGAAATAAA  | CAGGGCTTCCAGGTGCTTCGCAAGT  | 2             | 25        |
| <i>IL5</i>     | <a href="#">JQ290352.1</a>     | TGAGCACTGTGGTGAAGAG     | TTATGAGTGGGAACAGGAAGC    | ACTGACAAGCAACGAGACGGTGAG   | 2             | in-house  |
| <i>IL6</i>     | <a href="#">XM_005087110.2</a> | CCACCAGGAACGAAAGACAA    | CAGCAGTCCCAAGAAGACAA     | AACTTCATAGCTGTTCTGGAGGGC   | 2             | in-house  |
| <i>IL7</i>     | <a href="#">XM_021225270.1</a> | GTGTGGCTTCTGTGGACATATTA | GAGATTCGGCTAAGAGGCTTTC   | TTCCAGTCTCCAGAGTTGCCAAA    | 1             | in-house  |
| <i>Cxcl10</i>  | <a href="#">NM_001281344.1</a> | GCCATTCATCCACAGTTGACA   | CATGGTGCTGACAGTGGAGTCT   | CGTCCCAGCCAGCCAACGA        | 1             | 25        |
| <i>Irf7</i>    | <a href="#">XM_005063345.3</a> | AGCACGGGACGCTTTATC      | GACGGTCACTTCTCCCTATTC    | AGTTTGGATGTAAGGCCCGG       | 2             | in-house  |
| <i>Ddx58</i>   | NM_001310553.1                 | GTGCAACCTGGTCATTCTTTATG | GTCAGGAGGAAGCACTTACTATC  | AAACCAGAGGCAGAGGAAGAGCAA   | 2             | in-house  |
| <i>Stat1</i>   | <a href="#">NM_001281685.1</a> | AGGTCCGTGACGAGCTTAA     | GCCGTTCCACCACAAAT        | TCTGAATGAGCTGCTGGAAGAGGACA | 2             | 25        |
| <i>Stat6</i>   | <a href="#">XM_005079747.3</a> | AGCACCTCATTACCTTCAG     | AAGCATTGTCCCACAGGATAG    | ACCAAGACAACAATGCCAAAGCCA   | 2             | in-house  |
| <i>Tnfa</i>    | <a href="#">XM_005086799.3</a> | GGAGTGGCTGAGCCATCGT     | AGCTGGTTGTCTTTGAGAGACATG | CCAATGCCCTCTGGCCAACG-      | 1             | 25        |
